Ocean acidification effects on planktonic eukaryotes

**Short-term responses to ocean acidification: effects on relative abundance of eukaryotic plankton from the tropical Timor Sea**

Janina Rahlff<sup>1\*‡</sup>, Sahar Khodami<sup>2</sup>, Lisa Voskuhl<sup>3</sup>, Matthew P. Humphreys<sup>4</sup>,  
Christian Stolle<sup>1,5,#</sup>, Pedro Martinez Arbizu<sup>2</sup>, Oliver Wurl<sup>1</sup>, and Mariana Ribas-Ribas<sup>1</sup>

<sup>1</sup>Center for Marine Sensors, Institute for Chemistry and Biology of the Marine Environment (ICBM), Carl von Ossietzky University Oldenburg, 26382 Wilhelmshaven, Germany

<sup>‡</sup>Present address: University of Duisburg-Essen, Department of Chemistry, Environmental Microbiology and Biotechnology (EMB), 45141 Essen, Germany

<sup>2</sup>Senckenberg am Meer, German Center for Marine Biodiversity Research, 26382 Wilhelmshaven, Germany

<sup>3</sup>University of Duisburg-Essen, Department of Chemistry, Environmental Microbiology and Biotechnology (EMB), 45141 Essen, Germany

<sup>4</sup>NIOZ Royal Netherlands Institute for Sea Research, Department of Ocean Systems (OCS), and Utrecht University, 1790 AB Den Burg, Texel, the Netherlands

<sup>5</sup>Leibniz Institute for Baltic Sea Research (IOW), 18119 Rostock, Germany

<sup>#</sup>Present address: Project management Jülich, 18069 Rostock, Germany

\*Corresponding author: [janina.rahlff@uol.de](mailto:janina.rahlff@uol.de)

## Ocean acidification effects on planktonic eukaryotes

### ABSTRACT

Anthropogenic carbon dioxide (CO<sub>2</sub>) emissions drive climate change and pose one of the major challenges of our century. The effects of increased CO<sub>2</sub> in the form of ocean acidification (OA) on the communities of marine planktonic eukaryotes in tropical regions such as the Timor Sea are barely understood. Here, we show the effects of high CO<sub>2</sub> ( $p\text{CO}_2=1823\pm 161 \mu\text{atm}$ ,  $\text{pH}_T=7.46\pm 0.05$ ) versus *in situ* CO<sub>2</sub> ( $p\text{CO}_2=504\pm 42 \mu\text{atm}$ ,  $\text{pH}_T=7.95\pm 0.04$ ) seawater on the community composition of marine planktonic eukaryotes immediately and after 48 hours of treatment exposure in a shipboard microcosm experiment. Illumina sequencing of the V9 hypervariable region of 18S rRNA (gene) was used to study the eukaryotic community composition. Down-regulation of extracellular carbonic anhydrase occurred faster in the high CO<sub>2</sub> treatment. Increased CO<sub>2</sub> significantly suppressed the relative abundances of different eukaryotic operational taxonomic units (OTUs), including important primary producers. These effects were consistent between abundant (DNA-based) and active (cDNA-based) taxa after 48 hours, e.g., for the diatoms *Trieres chinensis* and *Stephanopyxis turris*. Effects were also very species-specific among different diatoms. Planktonic eukaryotes showed adaptation to the CO<sub>2</sub> treatment over time, but many OTUs were adversely affected by decreasing pH. OA effects might fundamentally impact the base of marine biodiversity, suggesting profound outcomes for food web functioning in the future ocean.

**KEYWORDS:** high CO<sub>2</sub>, low pH, phytoplankton, protists, tropics, copepods, 18S rRNA sequencing

## Ocean acidification effects on planktonic eukaryotes

### 1. INTRODUCTION

The world's oceans are a major sink for anthropogenic carbon dioxide (CO<sub>2</sub>) (Friedlingstein et al. 2019, Gruber et al. 2019). Absorption of atmospheric CO<sub>2</sub>, which is currently at 414 µatm (February 2020, <https://www.co2.earth/>) and driven by ongoing anthropogenic emissions, decreases pH while increasing the bicarbonate ion concentration and partial pressure of CO<sub>2</sub> (*p*CO<sub>2</sub>) of seawater. Man-made CO<sub>2</sub> emissions are expected to lead to ocean pH changes greater than any experienced in the last 300 million years, with a maximum predicted pH reduction of 0.77 in surface water for the year 2300 (Caldeira & Wickett 2003). The decrease in seawater pH, known as ocean acidification (OA) or “the other CO<sub>2</sub> problem” (Doney et al. 2009), affects ocean biogeochemistry and the physiology of a plethora of marine organisms, especially the calcifying ones (Orr et al. 2005, Kaniewska et al. 2012, Schlüter et al. 2016). The fifth assessment report of the IPCC suggests that net primary productivity in the tropical ocean will most likely decline by 7-16 % by 2081-2100 assuming the worst case “business as usual” scenario (Representative Concentration Pathway=RCP8.5), which predicts an atmospheric CO<sub>2</sub> concentration of >1000 µatm by the end of this century (Pachauri et al. 2014). Moreover, profound implications of OA effects on community and ecosystem processes can be expected but are difficult to predict (Riebesell et al. 2007, Fabry et al. 2008).

Changes in seawater pH and *p*CO<sub>2</sub> may have critical effects on the primary producers, i.e., phytoplankton that convert CO<sub>2</sub> to organic carbon during photosynthesis, and thus affect the base of the marine food web. Increased CO<sub>2</sub> is known to promote phytoplankton growth and photosynthetic rates (Wolf-Gladrow et al. 1999, Kroeker et al. 2013), although increases in the latter are assumed to be small and dependent on the phytoplankton species under investigation (reviewed by Raven et al. (2005)). Typical acclimation effects of phytoplankton to elevated CO<sub>2</sub> include the down-regulation of carbon concentrating mechanisms, e.g., of the enzyme

## Ocean acidification effects on planktonic eukaryotes

carbonic anhydrase (Mustaffa et al. 2017, Deppeler et al. 2018), demonstrating direct effects of OA on intracellular pH and enzyme activities. Furthermore, CO<sub>2</sub>-driven changes in element stoichiometry (King et al. 2015), community structure (Tortell et al. 2002, Feng et al. 2010), and size classes (Suffrian et al. 2008) of primary producers can alter food availability and quality for grazers and cascade up the whole food web (Rossoll et al. 2012, Cripps et al. 2016).

Copepods (phylum Arthropoda, class Copepoda (Pancrustacea)) are the most abundant metazoans on Earth (Humes 1994). They form the major dietary link between phytoplankton and ichthyoplankton as well as larger fish (Turner 2004). Copepods and other crustaceans were assumed to be more resilient towards OA effects compared to other marine organisms (Kurihara & Ishimatsu 2008, Whiteley 2011). However, this assumption mainly results from studies on adult copepod females and has been questioned (Cripps et al. 2014) supporting the lack of conclusive knowledge about OA effects on copepods that exist in the literature.

Insights on the effects of lowered pH on natural marine nano- to meso-sized planktonic organisms from the tropics are scarce. Hence, our objective was to study the impact of OA on a natural plankton community from the Timor Sea, tropical Indian Ocean in a microcosm experiment that was conducted onboard the *R/V Falkor* in October 2016. Probable OA effects on planktonic communities were investigated in one treatment with reduced pH ( $p\text{CO}_2=1823\pm 161 \mu\text{atm}$ ,  $\text{pH}_T=7.46\pm 0.05$ ) compared to an unaltered control ( $p\text{CO}_2=504\pm 42 \mu\text{atm}$ ,  $\text{pH}_T=7.95\pm 0.04$ ) at two consecutive time points. The effects of OA on abundant and active planktonic organisms were investigated as inferred from DNA and cDNA-based V9 hypervariable region of the 18S rRNA (gene) sequencing, respectively. Since literature on the topic reports inconclusive results of OA effects sometimes even for the same organism (Ridgwell et al. 2009, Meyer & Riebesell 2015, Thor & Oliva 2015), we expected to see

## Ocean acidification effects on planktonic eukaryotes

significant short-term OA effects after different exposure times on the relative abundance of some taxa as well as missing responses in others.

## 2. MATERIALS AND METHODS

### 2.1 Sampling and microcosm setup

During a research cruise on *R/V Falkor* (FK161010), sample water containing planktonic organisms was collected from the chlorophyll maximum at 65 m depth using a Conductivity, Temperature, Depth (CTD) unit at 19:20, 20<sup>th</sup> October 2016 (UTC) from the Timor Sea (11°51.25'S, 127°15.23'E). The region is tropical with summer and winter sea surface temperature >26 and >22 °C, respectively, and experiences periodic cyclone-generated storm currents (James et al. 2004). Water temperature and salinity at the time of sampling were at 28 °C and 35, respectively. Sampled seawater was randomly filled from CTD bottles into 24 x 1-L Nalgene polycarbonate bottles (Thermo Fisher Scientific, Darmstadt, Germany), which were wrapped into a foil (No 298, Lee Filters, Andover, UK) filtering daylight to approach light conditions at the sampling depth. Half of the bottles were acidified using an equimolar addition of strong acid (1 M HCl) and HCO<sub>3</sub> (1 M NaHCO<sub>3</sub>) to simulate effects of low pH/high CO<sub>2</sub> (treatment HICO) according to conditions expected in a future ocean (Pachauri et al. 2014). The other half of samples was kept at *in situ* conditions (treatment ISCO). All bottles were placed into a baby pool (99 x 99 x 23 cm, Wehnke, Germany). During sample incubations, fresh oceanic water was constantly pumped into the pool to keep the temperature as similar as possible to *in situ* conditions. Pool temperature was monitored by a portable PCD650 (EuTech Instruments, Singapore, Supplementary Figure S1). Incubations were carried out from the 20<sup>th</sup> (t<sub>0</sub>) to the 23<sup>th</sup> October, 00:40 UTC (t<sub>2</sub>), and for each day beginning at t<sub>0</sub>, four replicate bottles of each the HICO and the ISCO treatment were processed. The time period from acidification

## Ocean acidification effects on planktonic eukaryotes

until water filtration for  $t_0$  samples was three hours. Before water sample processing, the pH was measured in each bottle to monitor that the manipulation was effective.

### 2.2 Chlorophyll *a* extraction

Discrete chlorophyll *a* (chl *a*) analysis was performed on sampling water (initial samples after CTD, HICO, ISCO,  $n=4$ ), using the fluorometer JENWAY 6285 (Bibby Scientific Ltd., Felsted, Essex, UK). Readings on standards were taken by using commercial pure chl *a* (Sigma Aldrich, Taufkirchen, Germany). Water samples (160–300 mL of the 1L) were filtered onboard the *R/V* immediately onto glass microfiber filters (GF/F, diameter: 25 mm, Whatman, UK), were stored at  $-20$  °C, and shipped on dry ice for further analysis in the home laboratory. The filtered samples were extracted in 90% ethanol for 24 hours in the dark, before being measured fluorometrically in triplicates and according to the EPA Method 445.0 (Arar & Collins 1997).

### 2.3 Analysis of carbonate chemistry

Dissolved inorganic carbon (DIC) and total alkalinity (TA) samples were analyzed at the University of Southampton using a VINDTA 3C (Marianda, Kiel, Germany). The DIC was measured by coulometric titration, and TA by potentiometric titration and calculated using a modified Gran plot approach as implemented by Calkulate (version 1.0.2) (Bradshaw et al. 1981, Humphreys 2015). Measurements were calibrated using certified reference material (batches 144, 151 and 160) obtained from A.G. Dickson (Scripps Institution of Oceanography, USA). The  $1\sigma$  measurement precision was  $\pm 3$  and  $\pm 2$   $\mu\text{mol kg}^{-1}$  for DIC and TA, respectively. The remaining carbonate chemistry variables were calculated with PyCO2SYS (version 1.3.0) (Lewis & Wallace 1998, Van Heuven et al. 2011, Humphreys et al. 2020) using the carbonic acid dissociation constants of Lueker et al. (2000).

## Ocean acidification effects on planktonic eukaryotes

The dissociation constant for bisulphate dissociation was chosen according to Dickson (1990), and the ratio of total borate to salinity was in accordance with Lee et al. (2010).

Discrete samples for inorganic nutrients (nitrate and nitrite, phosphate and silicate) were collected from the same intervals as the DIC and TA samples. Inorganic nutrients were measured using a continuous flow analyzer (Quattro, CFA), Reader, Easychem (Strickland 1968, Fanning & Pilson 1973). The detection limit was 0.4  $\mu\text{M}$  for nitrate and nitrite, 0.04  $\mu\text{M}$  for phosphate and 0.1  $\mu\text{M}$  for silicate, and the limit of determination was 1.0  $\mu\text{M}$ , 0.13  $\mu\text{M}$ , and 0.3  $\mu\text{M}$  respectively.

### **2.4 DNA extraction and cDNA synthesis**

For DNA and RNA extraction, a two-step filtration of sampling water (150-400 mL from each bottle) was conducted, namely water was filtered through a 3.0  $\mu\text{m}$  pore size membrane filter. The flow-through was further filtered onto a 0.2  $\mu\text{m}$  polycarbonate membrane filter (47 mm diameter, Whatman, Maidstone, UK). All filters were initially stored at  $-80^{\circ}\text{C}$  prior analysis and shipped on dry ice to the home laboratory. Extraction of DNA and RNA from  $t_0$  and  $t_2$  filters for three biological replicates (half of a 0.2 and a 3  $\mu\text{m}$  filter were pooled in each case) was performed by using the DNA + RNA + Protein Extraction Kit (Roboklon, Berlin, Germany) and a modified protocol as described in Rahlff et al. (2017). Remaining DNA in RNA samples was digested on-column using 3 U of DNase, and all samples were subsequently checked for genomic DNA contaminations by polymerase chain reaction (PCR). A quantity of 10 ng RNA was reversely transcribed to cDNA using the NG dART Kit and therein included random hexamer primers (Roboklon, Berlin, Germany). Negative controls without reverse transcriptase and without RNA were included. The reaction was incubated for 60 minutes at  $50^{\circ}\text{C}$  followed by 5 minutes at  $85^{\circ}\text{C}$ .

## Ocean acidification effects on planktonic eukaryotes

### **2.5 Library preparation from V9-18S rRNA (gene) amplicons, sequencing and bioinformatics**

Two independent PCRs were carried out to attach the Nextera XT compatible Illumina adapter overhangs at the 5' ends of each amplicon following the Illumina 16S Metagenomic Sequencing Library Preparation guide (15044223Rev.B). The first PCR was conducted on a 3PrimeG thermocycler (Techne, Staffordshire, UK) using Phusion High Fidelity DNA Polymerase (Thermo Fisher Scientific, Darmstadt, Germany), 10 mM dNTPs, 3% DMSO and 0.5  $\mu$ M of the Tara Oceans eukaryote primer set 1389F/1510R targeting the V9 hypervariable region of the 18S ribosomal RNA gene (Amaral-Zettler et al. 2009). The primers were tagged with part of the Nextera compatible Illumina adapter overhang at the 5' ends of each primer. The PCR-cycling program was modified from a previously described one for this primer set (Alberti et al. 2017), namely 27 and 30 cycles instead of 25 were chosen for DNA and cDNA template, respectively.

Five  $\mu$ L of the first PCR products have been purified using 2  $\mu$ L of ExoSAP-IT PCR Product Cleanup Reagent (Thermo Fisher Scientific) following the manufacturer's protocol. A second PCR using Nextera XT V2 Indexed primers (dual indexing approach) has been performed to bind the Illumina overhang adapters to the product of the first PCR and was conducted at 98 °C for 2 min, 7 cycles of 15 s at 98 °C, 30 s at 62°C, 30 s at 72 °C and 72 °C for 2 min. The PCR products' cleanup was performed using 60% of the PCR products volume of Agencourt® Ampure® XP magnetic beads (Beckmann Coulter, Brea, CA, USA), and concentrations were measured using Qubit Fluorometric Quantitation (Thermo Fisher Scientific, Darmstadt, Germany). All amplicon concentrations were subsequently adjusted to 8 nM, pooled and purified from a 2% agarose gel stained with 2% Gel Red using Monarch® Nucleic Acid



## Ocean acidification effects on planktonic eukaryotes

Purification kit (New England Biolabs, Ipswich, MA, USA). The library was sequenced in two independent runs on an Illumina MiSeq platform using the MiSeq Reagent Nano Kit v2 (150 paired-end cycles). The resulted reads have been demultiplexed by MiSeq considering Nextera index sequences for both forward and reverse strands.

BBMap tool (Bushnell 2018) has been used for trimming the primers. The Vsearch pipeline (Rognes et al. 2016) was used for making contigs from each sample using the following settings: expected mean size of 170 bp with +/- 30 bp intervals, minimum contig overlap at 25 bp, and maximum allowed differences in the contig at 15 bp. Contigs have been filtered with maximum expected errors of 0.5 and maximum of 0 ambiguities in the contig and de-replicated. All de-noised and de-replicated samples from libraries have been initially clustered at 98% similarity to produce the initial operational taxonomic units (OTUs). After excluding chimeras, the initial OTUs have been clustered at a similarity threshold of 97 % (species level) for each sample, which has been recently recommended for PCR-based high-throughput sequencing data to obtain more realistic richness and Shannon diversity data from 18S amplicon data (Wylezich et al. 2018). The generated OTUs have been blasted against GenBank to assign taxonomies. Sequence reads were deposited at NCBI's sequence read archive (SRA) under Bioproject ID PRJNA623264.

### **2.6 Data analysis**

A total number of 2435 OTUs resulted after implementing all filtrations, in which the number of unique reads per library ranged from 20616 to 41687. After de-noising, chimera detection and de-replicating this has been reduced to 3051 to 5673. Number of resulted OTUs were between 503 and 1136 for the different samples (Supplementary Table S1).

## Ocean acidification effects on planktonic eukaryotes

Sequence data were analyzed using the “phyloseq” package (McMurdie & Holmes 2013) in R version 3.6.1. (Team 2017). Reads were normalized to minimum sequencing depth, which corresponded to 18056 reads. One replicate of the HICO t<sub>0</sub> cDNA samples was removed from the dataset due to a too small sequencing depth of 334.

For all calculations and plots we focused on the following phylogenetic groups: apicomplexans, brown-algae, cercozoans, choanoflagellates, ciliates, crustaceans, cryptomonads, ctenophores, diatoms, dinoflagellates, euglenoids, eukaryotes (no further classification), forams, golden\_algae, green\_algae, haptophytes, kinetoplastids and pelagophytes. Relative abundances were calculated and used for the following analyses. Shannon-Wiener diversity indices ( $\alpha$ -diversity) were calculated using the estimate\_richness function of the “phyloseq” package. We visualized the differences ( $\beta$ -diversity) of the eukaryotic planktonic community composition of samples through a Nonmetric Multidimensional Scaling (NMDS) plot based on Bray–Curtis dissimilarity indices.

For finding significant differences for extracellular carbonic anhydrase (eCA) concentrations and Shannon-Wiener indices between treatments, a one-way analysis of variances (one-way ANOVA) with 95 % confidence level was performed using R. The prerequisites for parametric tests, i.e., normal distribution of data and variance homogeneity were previously confirmed using Shapiro and Bartlett tests in R, respectively. A Tukey HSD *post-hoc* test was used to make multiple comparisons of means to find significant differences.

A two-sided t-test assuming unequal variances (Welch t-test) was conducted to find significant differences ( $\alpha \leq 0.05$ ) between relative abundances of individual OTUs in the ISCO and HICO treatments (n=3). Since the sample HICO t<sub>0</sub> cDNA lacked one replicate, the comparison ISCO/HICO for t<sub>0</sub> cDNA was omitted.

## Ocean acidification effects on planktonic eukaryotes

To elucidate the abundance of significantly CO<sub>2</sub>-affected taxa in both treatments., the proportion of significantly CO<sub>2</sub>-affected OTUs was calculated and assigned to one of five abundance categories (Table 2).

### 3. RESULTS

#### 3.1 Carbonate chemistry and temperature

Temperature in the pool varied between 27.0 and 34.0 °C from t<sub>0</sub> to t<sub>2</sub> (Supplementary Figure S1). Seawater pH<sub>T</sub>, i.e., pH on the Total scale, was consistent at t<sub>0</sub> and t<sub>1</sub> under both *p*CO<sub>2</sub> conditions with average values (mean ± standard deviation) of 7.44±0.03 and 7.93±0.02 for the HICO and ISCO treatment, respectively (Figure 1A). We measured a small increase in pH<sub>T</sub> of circa 0.06 in both experiments at t<sub>2</sub>, to 7.50±0.06 and 7.99±0.03. Dissolved inorganic carbon (DIC) was relatively stable throughout all experiments under both *p*CO<sub>2</sub> conditions (Figure 1B), with an average of 2018±14 μmol kg<sup>-1</sup> and 2213±14 μmol kg<sup>-1</sup> in the ISCO and HICO treatment, respectively.

The seawater *p*CO<sub>2</sub> was calculated from measured pH<sub>T</sub> and DIC along with relevant metadata, using the mean DIC values for each CO<sub>2</sub> treatment where those measurements were missing (Figure 1C). Like pH<sub>T</sub>, seawater *p*CO<sub>2</sub> was consistent at t<sub>0</sub> and t<sub>1</sub> under both *p*CO<sub>2</sub> conditions with average values of 1910±73 μatm and 526±30 μatm for the HICO and ISCO treatments respectively, but these values decreased to 1648±144 μatm and 460±20 μatm at t<sub>2</sub>. The calculated decrease in *p*CO<sub>2</sub> at t<sub>2</sub> was driven by the measured increase in pH<sub>T</sub>, which could be due to organic alkalinity degradation during the experiments (Martín Hernández-Ayon et al. 2007).

## Ocean acidification effects on planktonic eukaryotes

### 3.2 Chlorophyll *a*, nutrients, extracellular carbonic anhydrase

Discrete chl *a* analyses revealed concentrations  $<0.4 \mu\text{g L}^{-1}$  ( $n=4$ ) with no consistent difference between HICO and ISCO treatment (Figure 2A). Nutrient levels were overall low.  $\text{PO}_4$  and NOX were below the detection limit ( $0.04 \mu\text{M}$  for  $\text{PO}_4$  and  $0.4 \mu\text{M}$  for NOX). Silicate levels dropped from  $t_0$  to  $t_2$  from maximum  $7.20 \mu\text{M}$  to minimum  $5.52 \mu\text{M}$  with no major differences between ISCO and HICO treatments (Figure 2B). Concentration of eCA in seawater was measured in quadruplicates from  $t_0$  to  $t_2$ . Methods and data for this experiment were reported in the paper and supplement material of Mustaffa et al. (2017). Indeed, the concentration of eCA decreased faster in the HICO treatment compared to the ISCO treatment (Supplementary Figure 2 of Mustaffa et al. (2017)). ANOVA demonstrated significant differences for the eCA concentration ( $F=9.51$ ,  $df=4$ ,  $p=0.00049$ ). Means of eCA concentrations were not significantly different between ISCO and HICO treatment at  $t_0$ , but weakly significant at  $t_1$  (Tukey HSD,  $p=0.025$ ). Missing data for the HICO treatment at  $t_2$  were removed for the statistics (and not assumed to be equal to zero).

### 3.3 Plankton alpha and beta diversity in response to acidification

The one-way ANOVA indicated weak significant differences between the mean species diversities of the different sample types ( $F=4.62$ ,  $df=5$ ,  $p=0.014$ ). Species diversity analyses based on Shannon-Wiener index (Figure 3) showed that at  $t_0$  DNA-based OTUs showed a higher diversity measure in the ISCO (mean:  $3.6 \pm$  standard deviation:  $0.98$ ,  $n=3$ ) compared to the HICO treatment ( $2.3 \pm 0.53$ ,  $n=3$ ), which was not significant (Tukey HSD,  $p=0.1$ ).

Such differences were less pronounced for the cDNA-based OTUs, where both measures were equally high (ISCO:  $4.5 \pm 0.16$ ,  $n=3$ ; HICO:  $4.4$ ,  $n=2$ ). For  $t_2$ , the Shannon-Wiener index

## Ocean acidification effects on planktonic eukaryotes

differences between the acidification treatments based on DNA-based OTUs were less strong compared to  $t_0$  (ISCO:  $3.8 \pm 0.46$ ,  $n=3$ ; HICO:  $3.2 \pm 0.44$ ,  $n=3$ ) and even more similar for cDNA-based OTUs (ISCO:  $4.3 \pm 0.05$ ,  $n=3$ ; HICO:  $3.8 \pm 0.53$ ,  $n=3$ ). It follows that OTUs based on DNA sequencing (reflecting abundant taxa) seem slightly more prone to acidification effects because they have a lower Shannon-Wiener index compared to those based on cDNA sequencing (reflecting active taxa), though all differences between treatment pairings were not significant based on Tukey HSD test.

The community composition of each sample (Figure 4) revealed that the most striking differences in cDNA- and DNA-based OTUs between HICO and ISCO treatments at  $t_0$  were based on the different relative abundance of crustaceans. Overall, diversity of phyla appeared comparable between replicates (Figure 4). However, the community composition plots of the individual groups (diatoms, dinoflagellates etc.) showed profound differences in relative abundances between  $t_0$  and  $t_2$  (Supplementary Figures S2 – S12). Many OTUs that were undetectable at  $t_0$  reached considerable abundances at  $t_2$ . For instance, after 48 hours, active and abundant OTUs assigned to uncultured kinetoplastids and especially the genus *Bodonidae* sp., the ciliate *Eutintinnus fraknoi*, the cercozoan *Massisteria marina* and the choanoflagellate *Calliacantha* sp., strongly increased in relative abundance from  $t_0$  to  $t_2$  (Supplementary Figures S4, S5, S6, S12). On the other hand, OTUs assigned to dinoflagellates and some haptophytes, e.g., *Phaeocystis antarctica* decreased in relative abundance, whereas other haptophytes, e.g., an OTU related to *Pavlova gyrans*, became more abundant during the incubation period (Supplementary Figures S3 and S7).

In agreement with these abundance changes of different taxa, the NMDS plot (Figure 5, stress= 0.070) indicated that four distinct community clusters were formed. The clusters could be mostly distinguished based on the nucleic acid type used as PCR template (DNA or cDNA) and the

## Ocean acidification effects on planktonic eukaryotes

incubation period ( $t_0$  versus  $t_2$ ). Differences between HICO and ISCO treatment did not reveal strong effects at the phylum level, although at  $t_0$ , the two treatments showed some separation among the DNA-based OTUs. Communities based on cDNA and DNA resembled each other more at  $t_2$  than at  $t_0$ , and this observation was independent from the acidification treatment.

### 3.4 OA effects on the OTU level

Despite the fact that the acidification treatment induced no major differences at the phylum level (Figure 4), significant differences ( $p \leq 0.05$ ) were detectable at the OTU-level (Table 1). In most cases, the HICO treatment was associated with a lower relative abundance of significantly affected OTUs compared to the ISCO treatment.

For crustaceans, a higher relative abundance of the copepod species *Acartia longiremis* and *Calanus finmarchicus* was found among the DNA-based OTUs in the HICO treatment compared to the ISCO treatment (Supplementary Figure S8). For instance, the increase in relative abundance of an OTU assigned to *Calanus finmarchicus* was statistically significant in the HICO treatment at  $t_0$  (ISCO: DNA: mean=0.002 %, STD= $\pm 0.004$  %, HICO: DNA: mean=0.02 %  $\pm 0.0007$  %,  $p=0.015$ ).

At  $t_2$ , we sometimes found the same OTUs to be significantly affected by the OA treatment among the DNA and cDNA-based OTUs, e.g. for the diatoms *Trieres chinensis*, *Stephanopyxis turris* (OTU\_54) or *Synedra* sp. (Table 1). All significantly affected taxa (based on Welch t-test) are shown in Table 1.

## Ocean acidification effects on planktonic eukaryotes

### 4. DISCUSSION

#### 4.1 OA effects are species or even ecotype-specific

Increased atmospheric CO<sub>2</sub> burden due to enhanced anthropogenic fossil fuel emissions and associated OA is one of the major global issues of our time. The effects of OA on natural eukaryotic plankton communities, especially from the tropical Timor Sea are poorly understood, and our data show that the HICO treatment influenced the relative abundance of certain abundant and active taxa from this oceanic region. Since the copy number of the small subunit rRNA genes is known to correlate with the biovolume of marine diatoms and can reach considerable numbers per cell in this group (Godhe et al. 2008) and also in ciliates (Gong et al. 2013), we are aware about the difficulties of using this gene for the interpretation of single-celled protist numbers. However, it is impossible to know the exact copy number of the 18S rRNA (gene) for each OTU belonging to different protists of a mixed community of which many species are uncultured or even unknown. We made comparisons on the relative abundance of an OTU by comparing two treatments, meaning that even if an OTU species-specifically contains multiple 18S rRNA gene copies, it will probably do so in both treatments and is thus comparable.

While significant CO<sub>2</sub> effects were not immediately apparent at higher taxonomic levels (Figure 4), they became visible at the OTU level. We expected that phytoplankton OTUs would be most sensitive to changes in CO<sub>2</sub> due to their inorganic carbon requirements for primary production and found responses to OA in diatoms to be highly species- or even ecotype specific. Many diatoms affected by the HICO treatment decreased in relative abundance as a response including *Trieres chinensis*, *Synedra* sp., *Fragilariopsis doliolus*, *Pseudonitzschia australis*, *Pseudo-nitzschia subcurvata* (OTU\_210), *Stephanopyxis turris* (OTU\_54), and *Pleurosigma*

## Ocean acidification effects on planktonic eukaryotes

sp. The diatom *Stephanopyxis turris* (OTU\_54) showed a decrease in relative abundance in response to the HICO manipulation both in the DNA-and the cDNA-based investigation after 48 hours, most likely indicating that abundance and activity were both reduced by the treatment. This further confirms that the significant effect was real and not a false-positive random finding. A few diatoms also increased in abundance in the HICO treatment such as *Cocconeis placentula*, *Chaetoceros* sp., *Corethron criophilum*, *Grammonema striatula*, another *Pseudo-nitzschia subcurvata* (OTU\_659) and another *Stephanopyxis turris* (OTU\_505), matching the generally constant chl *a* concentration. Our results are in agreement with Schulz et al. (2017) postulating that CO<sub>2</sub> effects on diatoms are more likely to become visible on the species rather than on the phylum- or other higher taxonomic level.

Many studies of OA effects on natural microbial communities focus on polar waters complicating direct comparison to our findings from a tropical region. By investigating phytoplankton populations from the Ross Sea, Southern Ocean, Tortell et al. (2008) reported that growth of larger chain-forming diatoms such as *Chaetoceros* spp. increased in abundance in response to high CO<sub>2</sub> (800  $\mu$ atm), while the small pennate diatom *Pseudo-nitzschia subcurvata* decreased in this treatment. This finding matches our results apart from the fact that we had two different OTUs assigned to *Pseudo-nitzschia subcurvata*, and both had contrasting responses to the treatment at  $t_0$  and that our HICO treatment was much higher ( $p$ CO<sub>2</sub>=1823  $\mu$ atm). Also, we cannot conclude from our results that different morphologies of diatoms (centric vs. pennate) have different advantages in facing high and low CO<sub>2</sub> environments as proposed by Tortell et al. (2008), because in our study OTUs related to both morphology types decreased in relative abundance.

We also found contrasting responses to OA by two OTUs being both assigned to *Stephanopyxis turris*. This leads to the conclusion that very closely related diatom species (97% sequence



## Ocean acidification effects on planktonic eukaryotes

identity) can have very different responses to OA. Different responses of the same model species *Emiliana huxleyi* (but from different ecotypes) to carbonate chemistry manipulations were previously described (Ridgwell et al. 2009). An ecotype refers to a genetically distinct geographic population within a species. Ecotype-specific OA responses might lead to conflicting results between studies and explain the contrasting responses we found for OTUs assigned to *Stephanopyxis turris* and *Pseudo-nitzschia subcurvata*.

Immediate responses to OA were also observed for the dinoflagellate *Vulcanodinium rugosum*, which decreased in relative abundance at  $t_0$ . *V. rugosum* is known for being a harmful algae and producing pinnatoxins causing shellfish poisoning (Rhodes et al. 2011). While it is known that *V. rugosum* is thermophile and euryhaline (Abadie et al. 2016, Abadie et al. 2018), nothing is known about its response to OA. The immediate response and decrease in relative abundance among DNA-based OTUs from mean  $\pm$  STD=ISCO DNA mean: 1.9%  $\pm$  0.30 to HICO DNA mean: 0.76%  $\pm$  0.22 (n=3, Welch t-test,  $p=0.0083$ ) suggests that this dinoflagellate was sensitive to the HICO treatment. Effects of CO<sub>2</sub>-induced OA on dinoflagellates that are able to form (harmful) algal blooms have been previously studied, again showing very species-specific responses. For instance, biomass production in calcareous *Scrippsiella trochoidea* decreased, while toxic *Alexandrium tamarense* did not respond to an OA treatment (Eberlein et al. 2014).

Two copepod OTUs were BLAST-assigned to *Acartia longiremis* and *Calanus finmarchicus*. Although both species have their respective main distribution in the North Atlantic, we decided to keep these names here because there are some records of these species in the southern hemisphere in OBIS (<https://obis.org>). Both copepods showed sudden increases in relative abundance in response to the HICO treatment at  $t_0$ . The increases were striking but mostly not significant, most likely due to the variation between replicates. We can only speculate about the reason for the immediate response. It has been shown that lowered seawater pH can

## Ocean acidification effects on planktonic eukaryotes

influence copepod reproduction, hatching and development in some species (Kurihara et al. 2004, Mayor et al. 2007) whereas it had no significant effect on physiological parameters or grazing of copepods in other studies (Kurihara & Ishimatsu 2008, Mayor et al. 2012, Isari et al. 2015, Hildebrandt et al. 2016). This implies that OA effects are very species and context-specific and also dependent on the geographic origin of the copepod population (Thor & Oliva 2015), the life stage (Cripps et al. 2014), gender (Cripps et al. 2016), and even food quality provided (McLaskey et al. 2019). Samples that were most affected by the HICO treatment at  $t_0$  could have randomly contained a particular CO<sub>2</sub>-vulnerable life stage or gender of copepods. Or copepod carcasses and fecal pellets present in the samples were more slowly degraded in the HICO compared to the ISCO treatment.

By assigning affected taxa to different OTU abundance ranges (Table 2), we found that the proportion of HICO-treatment affected OTUs was lower compared to the ISCO treatment, especially in the high abundance ranges. This suggests that the HICO treatment overall had a suppressive effect on the relative abundance of taxa. For instance, OTUs that reached an abundance of 9.4% in the ISCO treatment in the 1-100% abundance range, were undetectable at such a high abundance in the HICO treatment. Not surprisingly, more OTUs were found in the lowest abundance range in the HICO treatment, which might be attributable to the pH manipulation.

### **4.2 Adaptations to the ocean acidification treatment**

The NMDS plot revealed that eukaryotic plankton community differences between DNA and cDNA-based OTUs became smaller at  $t_2$  compared to  $t_0$  (Figure 5). The incubation conditions (heat, low oxygen, and grazing pressure) likely selected for specific taxa that could resist those conditions and became abundant and active, while it led to a decreased abundance or even

## Ocean acidification effects on planktonic eukaryotes

extinction of others. The “bottle enclosure effect” exerted by incubations in closed systems (Gieskes et al. 1979) includes decreasing biomass of picophytoplankton, increasing biomass of heterotrophic bacteria (Calvo-Diaz et al. 2011), and increases the likelihood for host cell-virus encounters with potential to alter the community composition (Haro-Moreno et al. 2019). However, containment of natural seawater for 48 hours led to only minor changes in species richness (Figure 3, Shannon-Wiener Index) as previously reported (Countway et al. 2005).

We found an increase in the relative abundance of certain taxa from  $t_0$  to  $t_2$ , mainly of kinetoplastids, cercozoans, cryptomonads and choanoflagellates (Supplementary Figures S5, S6, S9, S12), while other taxa such as dinoflagellates tended to decrease in relative abundance. The decrease in relative abundance of dinoflagellates might be due to increased grazing or to enhanced vulnerability towards incubation conditions and associated community changes.

The fact that abundant and active eukaryotic communities became more similar with increased incubation time emphasizes that several members of the planktonic community were strongly affected by the incubation conditions. Since the effect occurred after 48 hours ( $t_2$ ) and independent of the OA treatment, our data show that longer bottle incubations to test for OA effects have to be conducted with great caution. If a reliable presentation of the *in situ* community is needed, direct processing at  $t_0$  is required as has been recently suggested for prokaryotic communities (Haro-Moreno et al. 2019). On the other hand, the “bottle enclosure effect” can also be systematically used to allow rare and underrepresented populations to flourish. OA studies often apply acclimation periods with gradually increasing  $\text{CO}_2$  to let organisms slowly adjust to new pH conditions (Hancock et al. 2018), which is probably a more realistic representation of OA than sudden pH manipulations. However, here we used acute elevations of seawater  $p\text{CO}_2$  to obtain a better understanding of the short-term sensitivity of planktonic organisms and because rapid (within a few days) shifts in picoeukaryote communities due to OA were previously detected (Meakin & Wyman 2011).

## Ocean acidification effects on planktonic eukaryotes

Adaptation of the planktonic eukaryotes to the OA treatment also became visible at the enzymatic level. The down-regulation of carbon concentrating mechanisms processes in response to high CO<sub>2</sub> serves as an energy saving mechanism, which has been previously observed in model phytoplankton species (Wu et al. 2010, Moroney et al. 2011) and natural phytoplankton communities from Antarctica (Young et al. 2015, Deppeler et al. 2018). Carbonic anhydrases, zinc-containing metallo-enzymes that catalyze the hydration of CO<sub>2</sub> into bicarbonate, are important components for the functioning of carbon concentrating mechanisms under CO<sub>2</sub>-limiting conditions (Mondal et al. 2016). Likewise, our data show a rapid decline in the concentration of extracellular carbonic anhydrase (eCA) in response to the HICO treatment in the (autotrophic) plankton community indicating an adaptation to the manipulation. The eCA concentration dropped more slowly in the ISCO compared to the HICO treatment (Supplementary Fig.2 of Mustaffa et al. (2017)). Dropping of eCA concentration in the ISCO treatment probably happened because of a depletion in phytoplankton biomass due to grazing in closed bottles and associated accumulation of respired CO<sub>2</sub> suppressing carbon concentrating mechanisms.

Despite constant pumping of fresh ocean water into the sampling pool, heating of incubation bottles during the day because of the tropical climate (Supplementary Figure S1) was a clear limitation of our experiment. Previous studies did not detect a synergetic effect of OA and warming on plankton communities (Paul et al. 2015, Horn et al. 2016). But to exclude additional effects by warming, e.g., the decrease of heterotrophic flagellate biomass (Moustaka-Gouni et al. 2016), we decided to compare effects of OA treatment only within but not between  $t_0$  and  $t_2$ . However, we assume that planktonic organisms were probably not adversely affected, i.e. killed, by the temperature at least until  $t_2$  because of the positive development of some groups

## Ocean acidification effects on planktonic eukaryotes

and ongoing transcription of rRNA indicating active cell growth and activity (Schaechter et al. 1958, Poulsen et al. 1993, Lanzén et al. 2011).

OA effects on natural planktonic communities especially from tropical regions are poorly understood and require further investigation. Incubations over several days provide the advantage that they sometimes allow rare taxa to flourish (even if artificially), hence allowing effects of OA to be discovered that would have stayed obscure otherwise. OA might particularly affect the rare and some thermophilic taxa believed to cope well with climate change without considering their actual response to OA. Although being rare, some taxa could be of human interest, because they produce important metabolites or are somehow involved in the complex interactions of the oceanic food web. Diatoms and dinoflagellates as important primary producers and base of the food web seemed particularly vulnerable to OA and incubation-induced community changes. Overall, unravelling the interactive or opposed effects of a warming and simultaneously acidifying ocean on different eukaryotic species from natural planktonic communities is a difficult task due to differential intra- and interspecies responses. The consequences for whole trophic networks of a future ocean will consequently be even harder to predict.

## 5. ACKNOWLEDGEMENTS

We thank the captain and crew members of the *R/V Falkor* (cruise FK161010). We further acknowledge the assistance of Lea Oeljeschläger and Nur Ili Hamizah Mustaffa during sample processing. We further thank Claudia Wylezich for sharing her expertise and providing valuable feedback on our manuscript. This work was funded by the European Research Council (ERC) project PASSME (grant number GA336408). This is publication number 69 from the Senckenberg am Meer Metabarcoding and Molecular Laboratory.

## Ocean acidification effects on planktonic eukaryotes

### 6. REFERENCES

- Abadie E, Chiantella C, Crottier A, Rhodes L, Masseret E, Berteaux T, Laabir M (2018) What are the main environmental factors driving the development of the neurotoxic dinoflagellate *Vulcanodinium rugosum* in a Mediterranean ecosystem (Ingril lagoon, France)? *Harmful algae* 75:75-86
- Abadie E, Muguet A, Berteaux T, Chomerat N, Hess P, Roque D'OrbCastel E, Masseret E, Laabir M (2016) Toxin and Growth Responses of the Neurotoxic Dinoflagellate *Vulcanodinium rugosum* to Varying Temperature and Salinity. *Toxins (Basel)* 8:136
- Alberti A, Poulain J, Engelen S, Labadie K, Romac S, Ferrera I, Albin G, Aury JM, Belsler C, Bertrand A, Cruaud C, Da Silva C, Dossat C, Gavory F, Gas S, Guy J, Haquelle M, Jacoby E, Jaillon O, Lemainque A, Pelletier E, Samson G, Wessner M, Genoscope Technical T, Acinas SG, Royo-Llonch M, Cornejo-Castillo FM, Logares R, Fernandez-Gomez B, Bowler C, Cochrane G, Amid C, Hoopen PT, De Vargas C, Grimsley N, Desgranges E, Kandels-Lewis S, Ogata H, Poulton N, Sieracki ME, Stepanauskas R, Sullivan MB, Brum JR, Duhaime MB, Poulos BT, Hurwitz BL, Tara Oceans Consortium C, Pesant S, Karsenti E, Wincker P (2017) Viral to metazoan marine plankton nucleotide sequences from the Tara Oceans expedition. *Sci Data* 4:170093
- Amaral-Zettler LA, McCliment EA, Ducklow HW, Huse SM (2009) A Method for Studying Protistan Diversity Using Massively Parallel Sequencing of V9 Hypervariable Regions of Small-Subunit Ribosomal RNA Genes. *Plos One* 4:e6372
- Arar EJ, Collins GB (1997) Method 445.0: In vitro determination of chlorophyll a and pheophytin a in marine and freshwater algae by fluorescence. United States Environmental Protection Agency, Office of Research and Development, National Exposure Research Laboratory Cincinnati
- Bradshaw AL, Brewer PG, Shafer DK, Williams RT (1981) Measurements of total carbon dioxide and alkalinity by potentiometric titration in the GEOSECS program. *Earth Planet Sc Lett* 55:99-115
- Bushnell B (2018) BBTtools. BBMap <https://sourceforge.net/projects/bbmap/>
- Caldeira K, Wickett ME (2003) Oceanography: anthropogenic carbon and ocean pH. *Nature* 425:365
- Calvo-Diaz A, Diaz-Perez L, Suarez LA, Moran XA, Teira E, Maranon E (2011) Decrease in the autotrophic-to-heterotrophic biomass ratio of picoplankton in oligotrophic marine waters due to bottle enclosure. *Appl Environ Microbiol* 77:5739-5746
- Countway PD, Gast RJ, Savai P, Caron DA (2005) Protistan diversity estimates based on 18S rDNA from seawater incubations in the Western North Atlantic. *J Eukaryot Microbiol* 52:95-106
- Cripps G, Flynn KJ, Lindeque PK (2016) Ocean Acidification Affects the Phyto-Zoo Plankton Trophic Transfer Efficiency. *Plos One* 11:e0151739
- Cripps G, Lindeque P, Flynn KJ (2014) Have we been underestimating the effects of ocean acidification in zooplankton? *Glob Chang Biol* 20:3377-3385
- Deppeler S, Petrou K, Schulz KG, Westwood K, Pearce I, McKinlay J, Davidson A (2018) Ocean acidification of a coastal Antarctic marine microbial community reveals a critical threshold for CO<sub>2</sub> tolerance in phytoplankton productivity. *Biogeosciences* 15:209-231
- Dickson A (1990) Standard Potential of the Reaction:  $\text{AgCl(s)} + 0.5 \text{H}_2(\text{g}) = \text{Ag(s)} + \text{HCl(aq)}$ , and the Standard Acidity Constant of the Ion  $\text{HSO}_4^-$  in Synthetic Seawater from 273.15 to 318.15 K. *J Chem Thermodyn* 22:113-127



## Ocean acidification effects on planktonic eukaryotes

- Doney SC, Fabry VJ, Feely RA, Kleypas JA (2009) Ocean acidification: the other CO<sub>2</sub> problem. *Ann Rev Mar Sci* 1:169-192
- Eberlein T, Van de Waal DB, Rost B (2014) Differential effects of ocean acidification on carbon acquisition in two bloom-forming dinoflagellate species. *Physiol Plant* 151:468-479
- Fabry VJ, Seibel BA, Feely RA, Orr JC (2008) Impacts of ocean acidification on marine fauna and ecosystem processes. *ICES J Mar Sci* 65:414-432
- Fanning KA, Pilson ME (1973) On the spectrophotometric determination of dissolved silica in natural waters. *Anal Chem* 45:136-140
- Feng Y, Hare CE, Rose JM, Handy SM, DiTullio GR, Lee PA, Smith WO, Peloquin J, Tozzi S, Sun J, Zhang Y, Dunbar RB, Long MC, Sohst B, Lohan M, Hutchins DA (2010) Interactive effects of iron, irradiance and CO<sub>2</sub> on Ross Sea phytoplankton. *Deep-Sea Res Pt I* 57:368-383
- Friedlingstein P, Jones MW, O'Sullivan M, Andrew RM, Hauck J, Peters GP, Peters W, Pongratz J, Sitch S, Le Quere C, Bakker DCE, Canadell JG, Ciais P, Jackson RB, Anthoni P, Barbero L, Bastos A, Bastrikov V, Becker M, Bopp L, Buitenhuis E, Chandra N, Chevallier F, Chini LP, Currie KI, Feely RA, Gehlen M, Gilfillan D, Gkritzalis T, Goll DS, Gruber N, Gutekunst S, Harris I, Haverd V, Houghton RA, Hurtt G, Ilyina T, Jain AK, Joetzjer E, Kaplan JO, Kato E, Goldewijk KK, Korsbakken JI, Landschutzer P, Lauvset SK, Lefevre N, Lenton A, Lienert S, Lombardozzi D, Marland G, McGuire PC, Melton JR, Metzl N, Munro DR, Nabel JEMS, Nakaoka SI, Neill C, Omar AM, Ono T, Peregon A, Pierrot D, Poulter B, Rehder G, Resplandy L, Robertson E, Rodenbeck C, Seferian R, Schwinger J, Smith N, Tans PP, Tian HQ, Tilbrook B, Tubiello FN, van der Werf GR, Wiltshire AJ, Zaehle S (2019) Global Carbon Budget 2019. *Earth Syst Sci Data* 11:1783-1838
- Gieskes W, Kraay G, Baars M (1979) Current 14C methods for measuring primary production: gross underestimates in oceanic waters. *Netherlands Journal of Sea Research* 13:58-78
- Godhe A, Asplund ME, Harnstrom K, Saravanan V, Tyagi A, Karunasagar I (2008) Quantification of diatom and dinoflagellate biomasses in coastal marine seawater samples by real-time PCR. *Appl Environ Microbiol* 74:7174-7182
- Gong J, Dong J, Liu X, Massana R (2013) Extremely high copy numbers and polymorphisms of the rDNA operon estimated from single cell analysis of oligotrich and peritrich ciliates. *Protist* 164:369-379
- Gruber N, Clement D, Carter BR, Feely RA, van Heuven S, Hoppema M, Ishii M, Key RM, Kozyr A, Lauvset SK, Lo Monaco C, Mathis JT, Murata A, Olsen A, Perez FF, Sabine CL, Tanhua T, Wanninkhof R (2019) The oceanic sink for anthropogenic CO<sub>2</sub> from 1994 to 2007. *Science* 363:1193-1199
- Hancock AM, Davidson AT, McKinlay J, McMinn A, Schulz KG, van den Enden RL (2018) Ocean acidification changes the structure of an Antarctic coastal protistan community. *Biogeosciences* 15:2393-2410
- Haro-Moreno JM, Rodriguez-Valera F, López-Pérez M (2019) Prokaryotic Population Dynamics and Viral Predation in a Marine Succession Experiment Using Metagenomics. *Front Microbiol* 10
- Hildebrandt N, Sartoris FJ, Schulz KG, Riebesell U, Niehoff B (2016) Ocean acidification does not alter grazing in the calanoid copepods *Calanus finmarchicus* and *Calanus glacialis*. *ICES J Mar Sci* 73:927-936
- Horn HG, Boersma M, Garzke J, Löder MGJ, Sommer U, Aberle N (2016) Effects of high CO<sub>2</sub> and warming on a Baltic Sea microzooplankton community. *ICES J Mar Sci* 73:772-782
- Humes AG (1994) How many copepods? *Ecology and Morphology of Copepods*. Springer

## Ocean acidification effects on planktonic eukaryotes

- Humphreys M (2015) Calculating seawater total alkalinity from open-cell titration data using a modified Gran plot technique. *Measurements and Concepts in Marine Carbonate Chemistry* (PhD Thesis, Ocean and Earth Science, University of Southampton, UK):25-44
- Humphreys MP, Pierrot D, van Heuven SMAC, E. L, Wallace DWR (2020) PyCO2SYS: marine carbonate system calculations in Python. Zenodo
- Isari S, Zervoudaki S, Saiz E, Pelejero C, Peters J (2015) Copepod vital rates under CO<sub>2</sub>-induced acidification: a calanoid species and a cyclopoid species under short-term exposures. *J Plankton Res* 37:912-922
- James NP, Bone Y, Kyser TK, Dix GR, Collins LB (2004) The importance of changing oceanography in controlling late Quaternary carbonate sedimentation on a high-energy, tropical, oceanic ramp: north-western Australia. *Sedimentology* 51:1179-1205
- Kaniewska P, Campbell PR, Kline DI, Rodriguez-Lanetty M, Miller DJ, Dove S, Hoegh-Guldberg O (2012) Major cellular and physiological impacts of ocean acidification on a reef building coral. *Plos One* 7:e34659
- King AL, Jenkins BD, Wallace JR, Liu Y, Wikfors GH, Milke LM, Meseck SL (2015) Effects of CO<sub>2</sub> on growth rate, C:N:P, and fatty acid composition of seven marine phytoplankton species. *Mar Ecol Prog Ser* 537:59-69
- Kroeker KJ, Kordas RL, Crim R, Hendriks IE, Ramajo L, Singh GS, Duarte CM, Gattuso JP (2013) Impacts of ocean acidification on marine organisms: quantifying sensitivities and interaction with warming. *Glob Chang Biol* 19:1884-1896
- Kurihara H, Ishimatsu A (2008) Effects of high CO<sub>2</sub> seawater on the copepod (*Acartia tsuensis*) through all life stages and subsequent generations. *Mar Pollut Bull* 56:1086-1090
- Kurihara H, Shimode S, Shirayama Y (2004) Effects of raised CO<sub>2</sub> concentration on the egg production rate and early development of two marine copepods (*Acartia steueri* and *Acartia erythraea*). *Mar Pollut Bull* 49:721-727
- Lanzén A, Jørgensen SL, Bengtsson MM, Jonassen I, Øvreås L, Urich T (2011) Exploring the composition and diversity of microbial communities at the Jan Mayen hydrothermal vent field using RNA and DNA. *FEMS Microbiol Ecol* 77:577-589
- Lee K, Kim T-W, Byrne RH, Millero FJ, Feely RA, Liu Y-M (2010) The universal ratio of boron to chlorinity for the North Pacific and North Atlantic oceans. *Geochimica et Cosmochimica Acta* 74:1801-1811
- Lewis E, Wallace D (1998) CO2SYS-Program developed for the CO<sub>2</sub> system calculations. Carbon Dioxide Inf Anal Center Report ORNL/CDIAC-105
- Lueker TJ, Dickson AG, Keeling CD (2000) Ocean pCO<sub>2</sub> calculated from dissolved inorganic carbon, alkalinity, and equations for K<sub>1</sub> and K<sub>2</sub>: validation based on laboratory measurements of CO<sub>2</sub> in gas and seawater at equilibrium. *Mar Chem* 70:105-119
- Martín Hernández-Ayon J, Zirino A, Dickson AG, Camiro-Vargas T, Valenzuela-Espinoza E (2007) Estimating the contribution of organic bases from microalgae to the titration alkalinity in coastal seawaters. *Limnol Oceanogr-Meth* 5:225-232
- Mayor DJ, Everett NR, Cook KB (2012) End of century ocean warming and acidification effects on reproductive success in a temperate marine copepod. *J Plankton Res* 34:258-262
- Mayor DJ, Matthews C, Cook K, Zuur AF, Hay S (2007) CO<sub>2</sub>-induced acidification affects hatching success in *Calanus finmarchicus*. *Mar Ecol Prog Ser* 350:91-97
- McLaskey AK, Keister JE, Schoo KL, Olson MB, Love BA (2019) Direct and indirect effects of elevated CO<sub>2</sub> are revealed through shifts in phytoplankton, copepod development, and fatty acid accumulation. *Plos One* 14:e0213931
- McMurdie PJ, Holmes S (2013) phyloseq: an R package for reproducible interactive analysis and graphics of microbiome census data. *Plos One* 8:e61217



## Ocean acidification effects on planktonic eukaryotes

- Meakin NG, Wyman M (2011) Rapid shifts in picoeukaryote community structure in response to ocean acidification. *ISME J* 5:1397-1405
- Meyer J, Riebesell U (2015) Reviews and Syntheses: Responses of coccolithophores to ocean acidification: a meta-analysis. *Biogeosciences* 12:1671-1682
- Mondal M, Khanra S, Tiwari ON, Gayen K, Halder GN (2016) Role of Carbonic Anhydrase on the Way to Biological Carbon Capture through microalgae-A Mini Review. *Environ Prog Sustain* 35:1605-1615
- Moroney JV, Ma YB, Frey WD, Fusilier KA, Pham TT, Simms TA, DiMario RJ, Yang J, Mukherjee B (2011) The carbonic anhydrase isoforms of *Chlamydomonas reinhardtii*: intracellular location, expression, and physiological roles. *Photosynth Res* 109:133-149
- Moustaka-Gouni M, Kormas KA, Scotti M, Vardaka E, Sommer U (2016) Warming and Acidification Effects on Planktonic Heterotrophic Pico- and Nanoflagellates in a Mesocosm Experiment. *Protist* 167:389-410
- Mustaffa NIH, Striebel M, Wurl O (2017) Extracellular carbonic anhydrase: Method development and its application to natural seawater. *Limnol Oceanogr Methods* 15:503-517
- Orr JC, Fabry VJ, Aumont O, Bopp L, Doney SC, Feely RA, Gnanadesikan A, Gruber N, Ishida A, Joos F, Key RM, Lindsay K, Maier-Reimer E, Matear R, Monfray P, Mouchet A, Najjar RG, Plattner GK, Rodgers KB, Sabine CL, Sarmiento JL, Schlitzer R, Slater RD, Totterdell IJ, Weirig MF, Yamanaka Y, Yool A (2005) Anthropogenic ocean acidification over the twenty-first century and its impact on calcifying organisms. *Nature* 437:681-686
- Pachauri RK, Allen MR, Barros VR, Broome J, Cramer W, Christ R, Church JA, Clarke L, Dahe Q, Dasgupta P (2014) Climate change 2014: synthesis report. Contribution of Working Groups I, II and III to the fifth assessment report of the Intergovernmental Panel on Climate Change. IPCC
- Paul C, Matthiessen B, Sommer U (2015) Warming, but not enhanced CO<sub>2</sub> concentration, quantitatively and qualitatively affects phytoplankton biomass. *Mar Ecol Progr Ser* 528:39-51
- Poulsen LK, Ballard G, Stahl DA (1993) Use of rRNA fluorescence in situ hybridization for measuring the activity of single cells in young and established biofilms. *Appl Environ Microbiol* 59:1354-1360
- Rahlff J, Stolle C, Giebel HA, Brinkhoff T, Ribas-Ribas M, Hodapp D, Wurl O (2017) High wind speeds prevent formation of a distinct bacterioneuston community in the sea-surface microlayer. *FEMS Microbiol Ecol* 93
- Raven J, Caldeira K, Elderfield H, Hoegh-Guldberg O, Liss P, Riebesell U, Shepherd J, Turley C, Watson A (2005) Ocean acidification due to increasing atmospheric carbon dioxide. Royal Society
- Rhodes L, Smith K, Selwood A, McNabb P, Munday R, Suda S, Molenaar S, Hallegraeff G (2011) Dinoflagellate *Vulcanodinium rugosum* identified as the causative organism of pinnatoxins in Australia, New Zealand and Japan. *Phycologia* 50:624-628
- Ridgwell A, Schmidt D, Turley C, Brownlee C, Maldonado M, Tortell P, Young J (2009) From laboratory manipulations to Earth system models: scaling calcification impacts of ocean acidification. *Biogeosciences* 6:2611-2623
- Riebesell U, Schulz KG, Bellerby RG, Botros M, Fritsche P, Meyerhofer M, Neill C, Nondal G, Oschlies A, Wohlers J, Zollner E (2007) Enhanced biological carbon consumption in a high CO<sub>2</sub> ocean. *Nature* 450:545-548
- Rognes T, Flouri T, Nichols B, Quince C, Mahe F (2016) VSEARCH: a versatile open source tool for metagenomics. *PeerJ* 4:e2584

## Ocean acidification effects on planktonic eukaryotes

- Rossoll D, Bermudez R, Hauss H, Schulz KG, Riebesell U, Sommer U, Winder M (2012) Ocean acidification-induced food quality deterioration constrains trophic transfer. *Plos One* 7:e34737
- Schaechter M, Maaløe O, Kjeldgaard NO (1958) Dependency on medium and temperature of cell size and chemical composition during balanced growth of *Salmonella typhimurium*. *Microbiology* 19:592-606
- Schlüter L, Lohbeck KT, Gröger JP, Riebesell U, Reusch TB (2016) Long-term dynamics of adaptive evolution in a globally important phytoplankton species to ocean acidification. *Sci Adv* 2:e1501660
- Schulz KG, Bach LT, Bellerby RGJ, Bermúdez R, Büdenbender J, Boxhammer T, Czerny J, Engel A, Ludwig A, Meyerhöfer M, Larsen A, Paul AJ, Sswat M, Riebesell U (2017) Phytoplankton Blooms at Increasing Levels of Atmospheric Carbon Dioxide: Experimental Evidence for Negative Effects on Pymnesiophytes and Positive on Small Picoeukaryotes. *Front Mar Sci* 4:64
- Strickland JD (1968) A practical handbook of seawater analysis. *Bull Fish Res Bd Canada* 167:81-86
- Suffrian K, Simonelli P, Nejstgaard JC, Putzeys S, Carotenuto Y, Antia AN (2008) Microzooplankton grazing and phytoplankton growth in marine mesocosms with increased CO<sub>2</sub> levels. *Biogeosciences* 5:1145-1156
- Team RC (2017) R: A language and environment for statistical computing. R Foundation for Statistical Computing, Vienna, Austria
- Thor P, Oliva EO (2015) Ocean acidification elicits different energetic responses in an Arctic and a boreal population of the copepod *Pseudocalanus acuspes*. *Mar Biol* 162:799-807
- Tortell PD, DiTullio GR, Sigman DM, Morel FM (2002) CO<sub>2</sub> effects on taxonomic composition and nutrient utilization in an Equatorial Pacific phytoplankton assemblage. *Mar Ecol Prog Ser* 236:37-43
- Tortell PD, Payne CD, Li Y, Trimborn S, Rost B, Smith WO, Riesselman C, Dunbar RB, Sedwick P, DiTullio GR (2008) CO<sub>2</sub> sensitivity of Southern Ocean phytoplankton. *Geophys Res Lett* 35
- Turner JT (2004) The importance of small planktonic copepods and their roles in pelagic marine food webs. *Zool Stud* 43:255-266
- Van Heuven S, Pierrot D, Rae J, Lewis E, Wallace D (2011) MATLAB program developed for CO<sub>2</sub> system calculations. ORNL/CDIAC-105b Carbon Dioxide Information Analysis Center, Oak Ridge National Laboratory, US Department of Energy, Oak Ridge, Tennessee 530
- Whiteley NM (2011) Physiological and ecological responses of crustaceans to ocean acidification. *Mar Ecol Prog Ser* 430:257-271
- Wolf-Gladrow DA, Riebesell U, Burkhardt S, Bijma J (1999) Direct effects of CO<sub>2</sub> concentration on growth and isotopic composition of marine plankton. *Tellus B* 51:461-476
- Wu Y, Gao K, Riebesell U (2010) CO<sub>2</sub>-induced seawater acidification affects physiological performance of the marine diatom *Phaeodactylum tricorutum*. *Biogeosciences* 7:2915-2923
- Wylezich C, Herlemann DP, Jürgens K (2018) Improved 18S rDNA amplification protocol for assessing protist diversity in oxygen-deficient marine systems. *Aquat Microb Ecol* 81:83-94
- Young JN, Kranz SA, Goldman JAL, Tortell PD, Morel FMM (2015) Antarctic phytoplankton down-regulate their carbon-concentrating mechanisms under high CO<sub>2</sub> with no change in growth rates. *Mar Ecol Prog Ser* 532:13-28

## Ocean acidification effects on planktonic eukaryotes

### 1 2 **Figures**

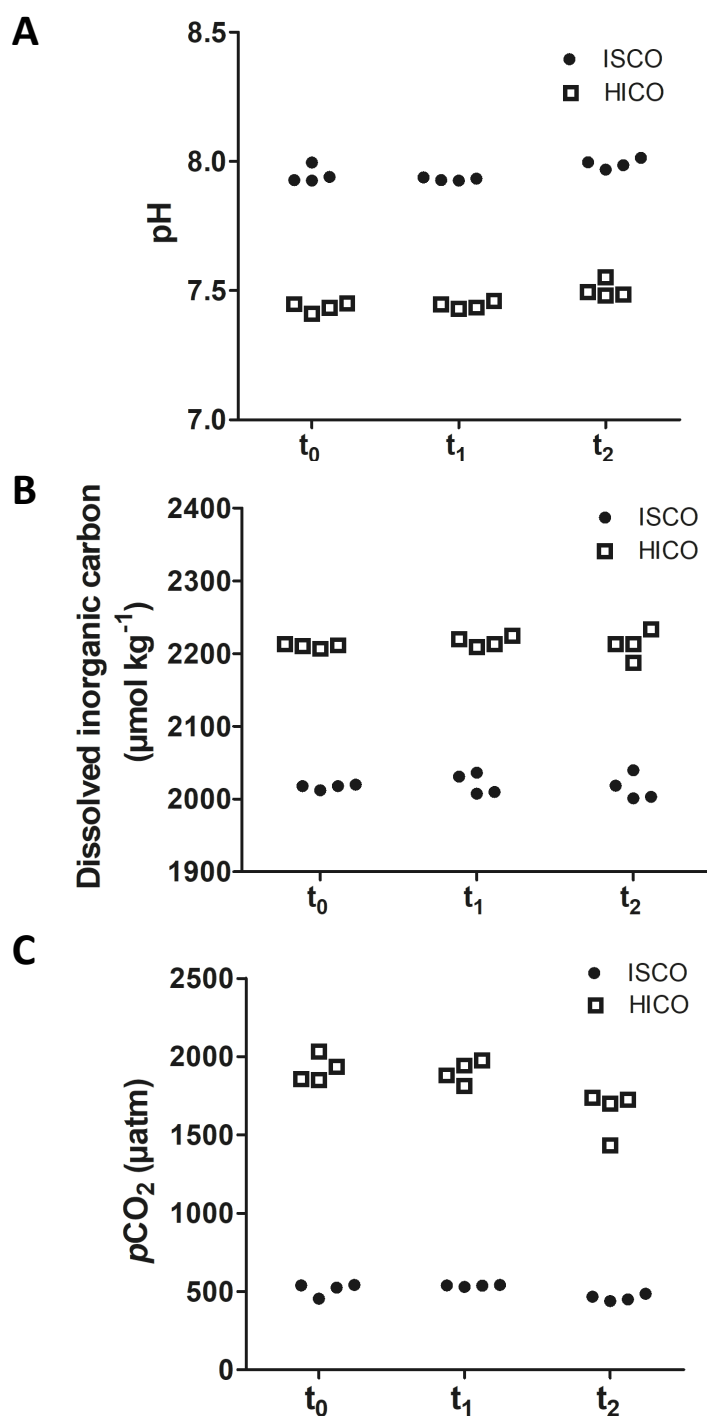

3  
4 **Figure 1:** Carbonate chemistry measurements during the experiments. A) Seawater pH (Total  
5 scale) measured directly during the experiments at *in situ* temperature (c. 25 °C). B) Dissolved  
6 inorganic carbon (DIC) measured later from subsamples of the experiment media. C) Seawater  
7  $p\text{CO}_2$  at *in situ* temperature calculated from the pH and DIC measurements shown in A) and  
8 B). For samples with no DIC measurement, the average DIC across all timepoints for all  
9 experiments at a similar  $\text{CO}_2$  level was used instead (i.e. 2018  $\mu\text{mol kg}^{-1}$  for ISCO experiments,  
10 and 2213  $\mu\text{mol kg}^{-1}$  for HICO experiments).

## Ocean acidification effects on planktonic eukaryotes

11  
12

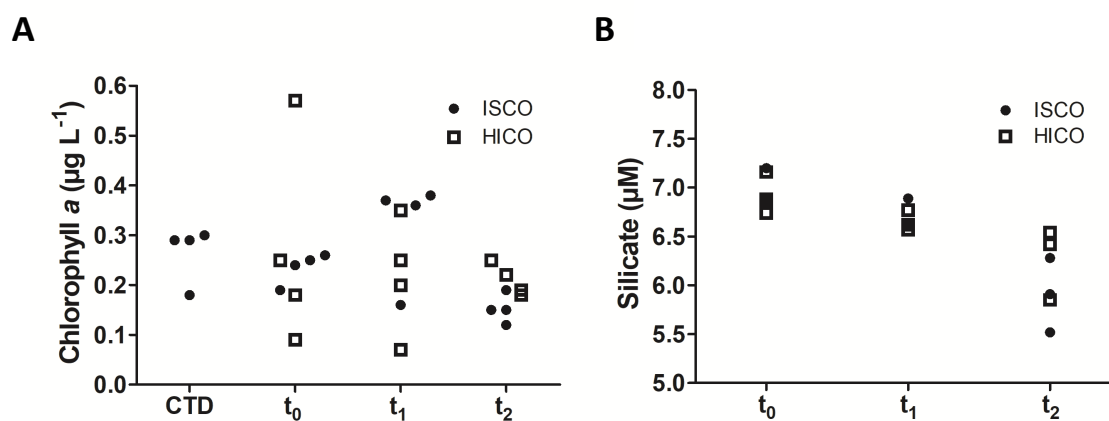

13  
14  
15  
16

**Figure 2:** A) Chlorophyll *a* concentration and B) silicate ( $\mu\text{M}$ ) measurements during the experiments (n=4).

## Ocean acidification effects on planktonic eukaryotes

17

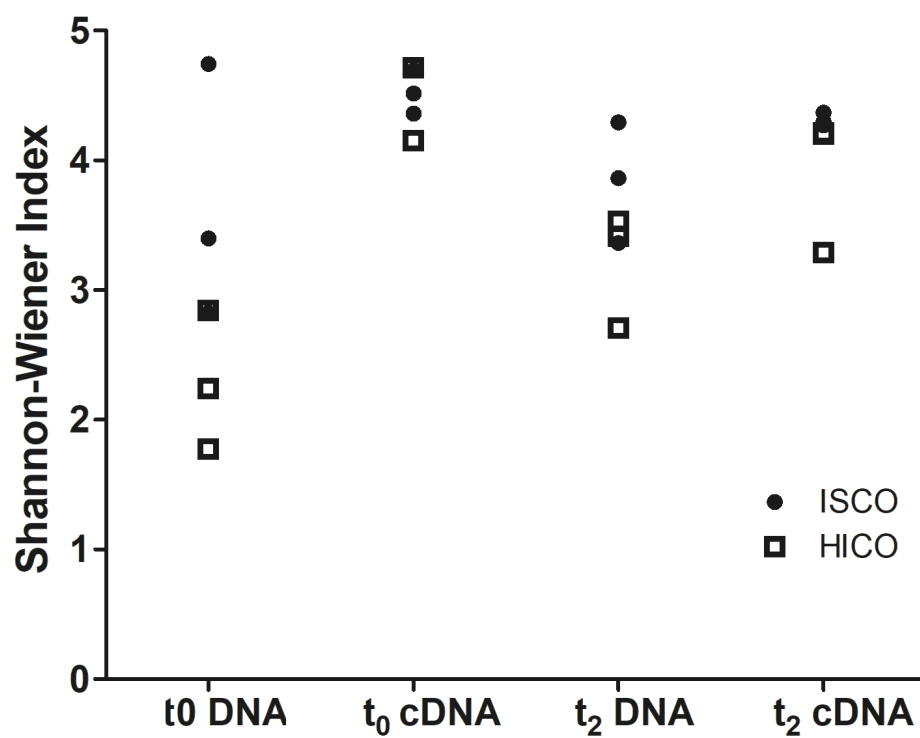

18  
19 **Figure 3:** Calculated Shannon-Wiener indices (species richness) of ISCO and HICO-treated  
20 samples. HICO= high  $p\text{CO}_2$ , ISCO= *in situ*  $p\text{CO}_2$

## Ocean acidification effects on planktonic eukaryotes

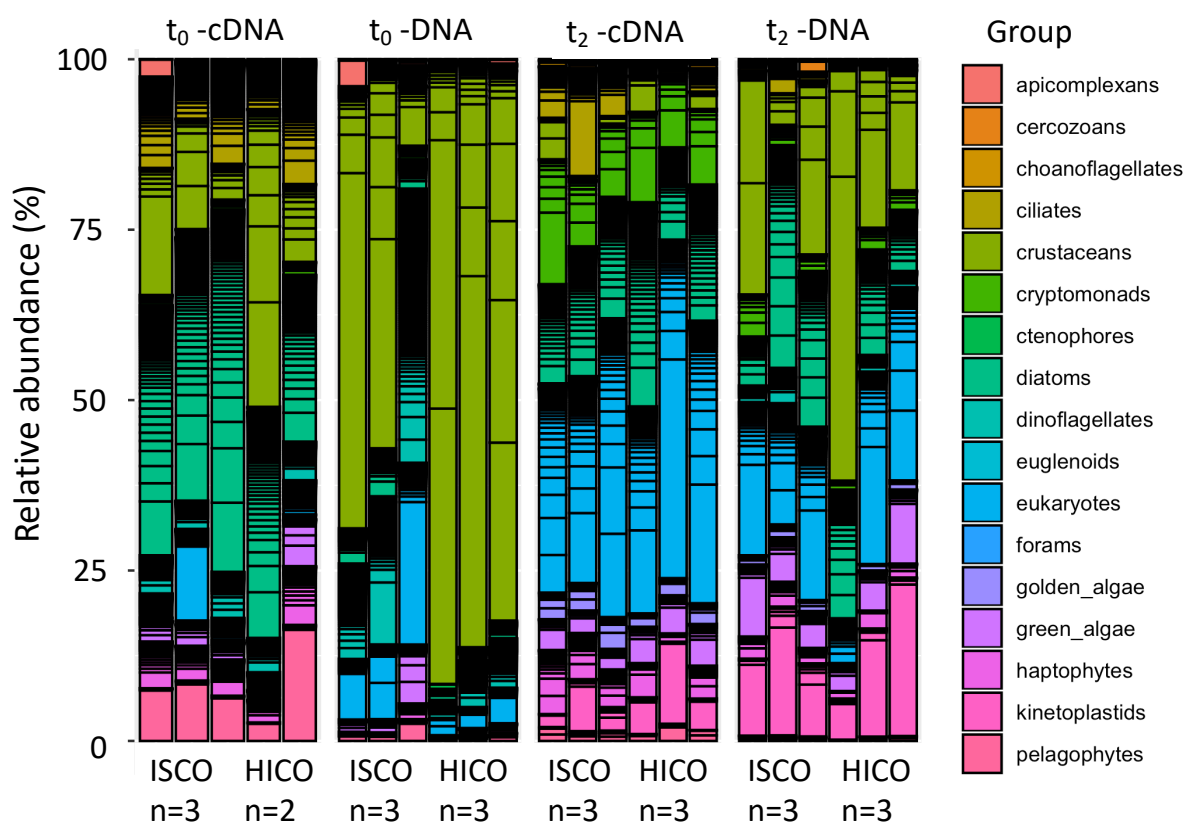

21  
22 **Figure 4:** Community composition of taxa expressed as relative abundance (%) of operational  
23 taxonomic units (OTUs) for ISCO and HICO-treated samples of three replicates (with  
24 exception of one sample).  
25  
26  
27  
28  
29  
30  
31  
32  
33  
34  
35  
36  
37  
38  
39  
40

## Ocean acidification effects on planktonic eukaryotes

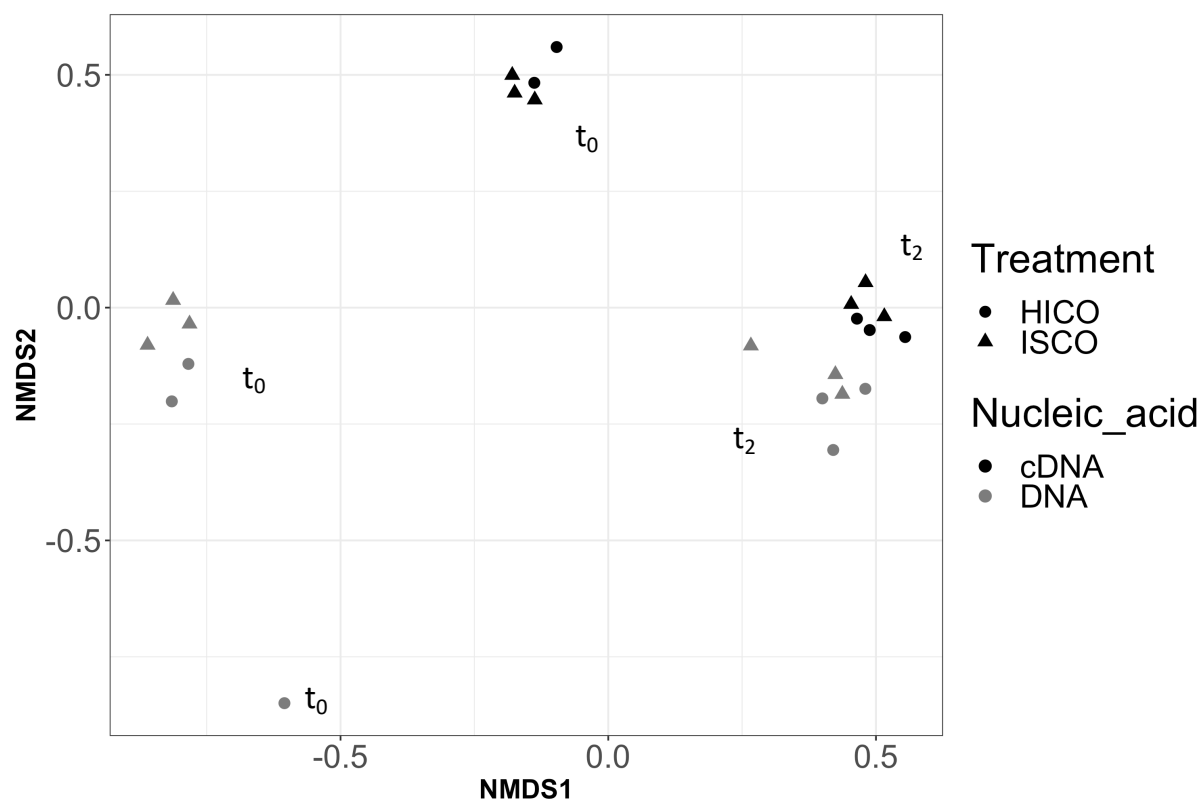

41  
42  
43  
44  
45

**Figure 5:** Non-metric multidimensional scaling (NMDS) plot calculated using Bray–Curtis dissimilarity. Circles indicate sample clusters. Stress=0.070, HICO= high  $p\text{CO}_2$ , ISCO= *in situ*  $p\text{CO}_2$

## Ocean acidification effects on planktonic eukaryotes

46 **Table 1:** Operational taxonomic units (OTUs) that are significantly affected ( $p \leq 0.05$ ) by the  
 47 ocean acidification treatment ( $n=3$  for each group). The value in the ISCO<sub>m</sub> and HICO<sub>m</sub>  
 48 column represents the mean of relative abundance (%) for three biological replicates.  
 49 Asterisks indicate significance (Sig.) level (\* =  $p \leq 0.05$ , \*\* =  $p \leq 0.01$ , \*\*\* =  $p \leq 0.001$ ).  
 50 CV=coefficient of variation, STD=standard deviation

| DNA t <sub>0</sub> |                 |                                       |                   |       |        |                   |       |        |         |      |
|--------------------|-----------------|---------------------------------------|-------------------|-------|--------|-------------------|-------|--------|---------|------|
| OTU                | Group           | Species                               | ISCO <sub>m</sub> | STD   | CV (%) | HICO <sub>m</sub> | STD   | CV (%) | p-value | Sig. |
| OTU_418            | ciliates        | <i>Eutimninus cf. apertus</i>         | 0.015             | 0.002 | 16.6   | 0                 | 0.000 |        | 0.009   | **   |
| OTU_490            | ciliates        | <i>Rimostrombidium lacustris</i>      | 0.010             | 0.003 | 35.3   | 0                 | 0.000 |        | 0.039   | *    |
| OTU_431            | ciliates        | <i>Ariosterostoma marinum</i>         | 0.022             | 0.008 | 34.5   | 0.004             | 0.007 | 173.2  | 0.045   | *    |
| OTU_888            | crustaceans     | <i>Calanus finmarchicus</i>           | 0.002             | 0.004 | 173.2  | 0.019             | 0.001 | 4.0    | 0.015   | *    |
| OTU_967            | cryptomonads    | <i>Geminigera cryophila</i>           | 0.007             | 0.001 | 16.6   | 0                 | 0.000 |        | 0.009   | **   |
| OTU_793            | cryptomonads    | <i>Goniomonas sp. SH8</i>             | 0.032             | 0.004 | 13.9   | 0.006             | 0.000 | 4.0    | 0.010   | **   |
| OTU_61             | cryptomonads    | uncultured <i>Proteomonas</i>         | 0.012             | 0.003 | 22.2   | 0                 | 0.000 |        | 0.016   | *    |
| OTU_25             | diatoms         | <i>Fragilariopsis doliolus</i>        | 0.436             | 0.021 | 4.9    | 0.117             | 0.075 | 63.8   | 0.013   | *    |
| OTU_143            | diatoms         | <i>Grammonema striatula</i>           | 0.076             | 0.019 | 25.7   | 0.008             | 0.004 | 47.3   | 0.023   | *    |
| OTU_34             | diatoms         | <i>Bacillaria paxillifer</i>          | 0.254             | 0.058 | 23.0   | 0.064             | 0.012 | 18.9   | 0.026   | *    |
| OTU_659            | diatoms         | <i>Pseudonitzschia subcurvata</i>     | 0.002             | 0.004 | 173.2  | 0.012             | 0.000 | 4.0    | 0.042   | *    |
| OTU_138            | diatoms         | <i>Pseudonitzschia australis</i>      | 0.078             | 0.025 | 31.8   | 0.014             | 0.004 | 24.6   | 0.045   | *    |
| OTU_210            | diatoms         | <i>Pseudonitzschia subcurvata</i>     | 0.052             | 0.016 | 30.5   | 0.011             | 0.019 | 173.2  | 0.046   | *    |
| OTU_174            | diatoms         | <i>Pleurosigma sp. 102</i>            | 0.097             | 0.030 | 31.2   | 0.031             | 0.013 | 43.0   | 0.047   | *    |
| OTU_312            | dinoflagellates | <i>Herdmania litoralis</i>            | 0.327             | 0.036 | 11.0   | 0.056             | 0.006 | 10.0   | 0.005   | **   |
| OTU_84             | dinoflagellates | <i>Vulcanodinium rugosum</i>          | 1.880             | 0.302 | 16.1   | 0.757             | 0.221 | 29.2   | 0.008   | **   |
| OTU_365            | dinoflagellates | <i>Gyrodinium sp. HJ2011</i>          | 0.093             | 0.013 | 13.6   | 0.035             | 0.005 | 13.4   | 0.009   | **   |
| OTU_1708           | dinoflagellates | uncultured <i>Syndiniales</i>         | 0.012             | 0.003 | 22.2   | 0                 | 0.000 |        | 0.016   | *    |
| OTU_801            | dinoflagellates | <i>Herdmania litoralis</i>            | 0.029             | 0.008 | 27.9   | 0.004             | 0.007 | 173.2  | 0.018   | *    |
| OTU_1195           | dinoflagellates | uncultured <i>Amoebophrya</i>         | 0.032             | 0.010 | 30.7   | 0.002             | 0.004 | 173.2  | 0.024   | *    |
| OTU_321            | dinoflagellates | <i>Amphidinium belauense</i>          | 0.146             | 0.040 | 27.6   | 0.036             | 0.021 | 58.8   | 0.024   | *    |
| OTU_527            | dinoflagellates | <i>Scrippsiella cf. erinaceus</i>     | 0.083             | 0.012 | 14.4   | 0.027             | 0.021 | 77.8   | 0.027   | *    |
| OTU_716            | dinoflagellates | <i>Peridinium sociale</i>             | 0.021             | 0.005 | 22.2   | 0.006             | 0.006 | 101.1  | 0.030   | *    |
| OTU_713            | dinoflagellates | <i>Scrippsiella hangoei</i>           | 0.021             | 0.005 | 21.9   | 0.006             | 0.006 | 98.5   | 0.031   | *    |
| OTU_1209           | dinoflagellates | <i>Karenia mikimotoi</i>              | 0.032             | 0.010 | 33.0   | 0.004             | 0.004 | 86.7   | 0.034   | *    |
| OTU_794            | dinoflagellates | uncultured <i>Amoebophrya</i>         | 0.065             | 0.024 | 36.9   | 0.004             | 0.007 | 173.2  | 0.038   | *    |
| OTU_988            | dinoflagellates | uncultured dinoflagellate             | 0.010             | 0.003 | 35.3   | 0                 | 0.000 |        | 0.039   | *    |
| OTU_1764           | dinoflagellates | uncultured <i>Amoebophrya</i>         | 0.010             | 0.003 | 35.7   | 0                 | 0.000 |        | 0.040   | *    |
| OTU_797            | dinoflagellates | uncultured <i>Syndiniales</i>         | 0.024             | 0.010 | 41.6   | 0.002             | 0.004 | 173.2  | 0.049   | *    |
| OTU_450            | dinoflagellates | <i>Islandinium tricingulatum</i>      | 0.044             | 0.015 | 34.5   | 0.008             | 0.003 | 39.6   | 0.049   | *    |
| OTU_356            | eukaryotes      | <i>Vacuolaria virescens</i>           | 0.032             | 0.004 | 14.2   | 0.002             | 0.004 | 173.2  | 0.001   | **   |
| OTU_1217           | eukaryotes      | <i>Larcopyle butschlii</i>            | 0.012             | 0.003 | 22.2   | 0                 | 0.000 |        | 0.016   | *    |
| OTU_1725           | eukaryotes      | <i>Picobiliphyte sp. MS58411</i>      | 0.010             | 0.003 | 35.3   | 0                 | 0.000 |        | 0.039   | *    |
| OTU_373            | eukaryotes      | <i>Artostrobos sp. 2014</i>           | 0.088             | 0.025 | 27.9   | 0.034             | 0.020 | 59.9   | 0.043   | *    |
| OTU_445            | golden algae    | <i>Spumellalike flagellate JBNZ43</i> | 0.007             | 0.001 | 16.6   | 0                 | 0.000 |        | 0.009   | **   |
| OTU_792            | green algae     | uncultured <i>Chlorophyta</i>         | 0.021             | 0.005 | 22.2   | 0.002             | 0.004 | 173.2  | 0.006   | **   |
| OTU_1809           | green algae     | uncultured <i>Chlorophyta</i>         | 0.007             | 0.001 | 16.6   | 0                 | 0.000 |        | 0.009   | **   |
| OTU_2192           | green algae     | uncultured <i>Chlorophyta</i>         | 0.007             | 0.001 | 16.6   | 0                 | 0.000 |        | 0.009   | **   |
| OTU_795            | green algae     | uncultured <i>Chlorophyta</i>         | 0.027             | 0.008 | 27.8   | 0                 | 0.000 |        | 0.025   | *    |
| OTU_112            | green algae     | uncultured <i>Chlorophyta</i>         | 0.067             | 0.021 | 30.6   | 0.015             | 0.016 | 110.8  | 0.028   | *    |
| OTU_524            | kinetoplastids  | <i>Kentomonas sorsogonicus</i>        | 0.015             | 0.002 | 16.6   | 0.002             | 0.003 | 173.2  | 0.009   | **   |
| OTU_305            | pelagophytes    | <i>Coccolid pelagophyte CCMP1395</i>  | 0.070             | 0.025 | 35.9   | 0.011             | 0.014 | 126.5  | 0.036   | *    |

51  
52  
53



## Ocean acidification effects on planktonic eukaryotes

| DNA t <sub>2</sub>  |                 |                                            |                   |       |        |                   |       |        |         |      |
|---------------------|-----------------|--------------------------------------------|-------------------|-------|--------|-------------------|-------|--------|---------|------|
| OTU                 | Group           | Species                                    | ISCO <sub>m</sub> | STD   | CV (%) | HICO <sub>m</sub> | STD   | CV (%) | p-value | Sig. |
| OTU_251             | ciliates        | <i>Eutintinnus tenuis</i>                  | 0.034             | 0.009 | 27.1   | 0.000             | 0.000 |        | 0.024   | *    |
| OTU_222             | ciliates        | <i>Laboea strobila</i>                     | 0.064             | 0.016 | 25.5   | 0.023             | 0.008 | 36.3   | 0.031   | *    |
| OTU_1046            | ciliates        | uncultured <i>Tintinnida</i>               | 0.013             | 0.005 | 37.9   | 0                 | 0.000 |        | 0.045   | *    |
| OTU_61              | cryptomonads    | uncultured <i>Proteomonas</i>              | 0.652             | 0.228 | 35.0   | 0.010             | 0.005 | 49.9   | 0.039   | *    |
| OTU_793             | cryptomonads    | <i>Goniomonas</i> _sp._SH8                 | 0.027             | 0.010 | 37.9   | 0                 | 0.000 |        | 0.045   | *    |
| OTU_145             | diatoms         | <i>Synedra</i> _sp._p517                   | 0.543             | 0.125 | 23.0   | 0.163             | 0.111 | 67.7   | 0.017   | *    |
| OTU_54              | diatoms         | <i>Stephanopyxis turris</i>                | 1.153             | 0.413 | 35.8   | 0.209             | 0.272 | 130.0  | 0.037   | *    |
| OTU_209             | diatoms         | <i>Trieres chinensis</i>                   | 0.099             | 0.033 | 32.9   | 0.024             | 0.025 | 102.4  | 0.037   | *    |
| OTU_52              | diatoms         | <i>Trieres chinensis</i>                   | 1.674             | 0.136 | 8.1    | 0.385             | 0.493 | 128.2  | 0.038   | *    |
| OTU_505             | diatoms         | <i>Stephanopyxis turris</i>                | 0.005             | 0.004 | 86.7   | 0.017             | 0.005 | 30.1   | 0.042   | *    |
| OTU_713             | dinoflagellates | <i>Scrippsiella hangoei</i>                | 0.013             | 0.005 | 37.9   | 0.003             | 0.004 | 173.2  | 0.050   | *    |
| OTU_2077            | eukaryotes      | <i>Bicosoeca vacillans</i>                 | 0.008             | 0.000 | 5.0    | 0                 | 0.000 |        | 0.001   | ***  |
| OTU_115             | eukaryotes      | <i>Rhizochromulina</i> _cf._marina         | 0.299             | 0.094 | 31.3   | 0.078             | 0.034 | 44.3   | 0.042   | *    |
| OTU_62              | eukaryotes      | <i>Pirsonia guinardiae</i>                 | 0.592             | 0.196 | 33.1   | 0.100             | 0.047 | 47.1   | 0.042   | *    |
| OTU_401             | eukaryotes      | <i>Rhizidiomyces apophysatus</i>           | 0.010             | 0.004 | 38.3   | 0                 | 0.000 |        | 0.046   | *    |
| OTU_442             | golden algae    | <i>Spumella</i> _sp._GOT220                | 0.066             | 0.023 | 34.8   | 0.002             | 0.004 | 173.2  | 0.037   | *    |
| OTU_602             | golden algae    | <i>Hibberdia magna</i>                     | 0.040             | 0.016 | 39.3   | 0.007             | 0.008 | 106.3  | 0.050   | *    |
| OTU_1946            | green algae     | uncultured <i>Chlorophyta</i>              | 0.008             | 0.000 | 5.0    | 0                 | 0.000 |        | 0.001   | ***  |
| OTU_2405            | green algae     | <i>Micromonas commoda</i>                  | 0.008             | 0.000 | 5.0    | 0                 | 0.000 |        | 0.001   | ***  |
| OTU_851             | green algae     | uncultured <i>Chlorophyta</i>              | 0.032             | 0.008 | 23.8   | 0.008             | 0.008 | 100.6  | 0.018   | *    |
| OTU_523             | green algae     | <i>Prasinoderma coloniale</i>              | 0.048             | 0.009 | 19.3   | 0.015             | 0.015 | 99.4   | 0.041   | *    |
| OTU_192             | haptophytes     | <i>Haptophyta</i> _environmental_samples   | 0.114             | 0.024 | 20.7   | 0.010             | 0.009 | 86.6   | 0.010   | **   |
| OTU_168             | haptophytes     | <i>Haptophyta</i> _environmental_samples   | 0.096             | 0.028 | 29.7   | 0.005             | 0.004 | 87.7   | 0.029   | *    |
| OTU_412             | haptophytes     | <i>Haptophyta</i> _environmental_samples   | 0.065             | 0.021 | 31.8   | 0.007             | 0.007 | 99.4   | 0.029   | *    |
| OTU_394             | haptophytes     | <i>prymnesiophyte symbiont_4</i>           | 0.037             | 0.013 | 35.1   | 0.005             | 0.004 | 86.6   | 0.040   | *    |
| OTU_246             | haptophytes     | <i>Haptophyta</i> _environmental_samples   | 0.043             | 0.018 | 41.4   | 0.005             | 0.009 | 173.2  | 0.047   | *    |
| cDNA t <sub>2</sub> |                 |                                            |                   |       |        |                   |       |        |         |      |
| OTU                 | Group           | Species                                    | ISCO <sub>m</sub> | STD   | CV (%) | HICO <sub>m</sub> | STD   | CV (%) | p-value | Sig. |
| OTU_222             | ciliates        | <i>Laboea strobila</i>                     | 0.315             | 0.044 | 14.0   | 0.093             | 0.065 | 69.7   | 0.011   | *    |
| OTU_349             | ciliates        | uncultured <i>Tintinnida</i>               | 0.038             | 0.011 | 28.0   | 0                 | 0.000 |        | 0.025   | *    |
| OTU_351             | ciliates        | <i>Strombidium biarmatum</i>               | 0.087             | 0.028 | 32.2   | 0.013             | 0.013 | 100.7  | 0.029   | *    |
| OTU_1822            | ciliates        | <i>Eutintinnus tenuis</i>                  | 0.011             | 0.004 | 33.8   | 0.000             | 0.000 |        | 0.036   | *    |
| OTU_331             | ciliates        | uncultured ciliate                         | 0.080             | 0.023 | 29.2   | 0.025             | 0.007 | 27.1   | 0.046   | *    |
| OTU_54              | diatoms         | <i>Stephanopyxis turris</i>                | 2.612             | 0.242 | 9.3    | 0.293             | 0.376 | 128.2  | 0.002   | **   |
| OTU_52              | diatoms         | <i>Trieres chinensis</i>                   | 1.031             | 0.047 | 4.6    | 0.240             | 0.151 | 62.9   | 0.007   | **   |
| OTU_1482            | diatoms         | <i>Cocconeis placentula</i>                | 0.002             | 0.004 | 173.2  | 0.017             | 0.004 | 21.7   | 0.008   | **   |
| OTU_475             | diatoms         | <i>Chaetoceros</i> _sp                     | 0.004             | 0.004 | 86.6   | 0.025             | 0.006 | 25.9   | 0.015   | *    |
| OTU_169             | diatoms         | <i>Corethron criophilum</i>                | 0.034             | 0.003 | 10.3   | 0.141             | 0.028 | 19.6   | 0.020   | *    |
| OTU_145             | diatoms         | <i>Synedra</i> _sp._p517                   | 0.770             | 0.161 | 20.9   | 0.303             | 0.156 | 51.5   | 0.023   | *    |
| OTU_1078            | dinoflagellates | uncultured <i>Gymnodinium</i>              | 0                 | 0.000 |        | 0.010             | 0.004 | 36.1   | 0.041   | *    |
| OTU_2303            | eukaryotes      | <i>Bicosoeca vacillans</i>                 | 0.036             | 0.004 | 10.7   | 0.006             | 0.006 | 100.8  | 0.004   | **   |
| OTU_742             | eukaryotes      | haptophytes                                | 0.032             | 0.006 | 19.1   | 0.006             | 0.006 | 100.7  | 0.007   | **   |
| OTU_765             | eukaryotes      | <i>Pseudobodo tremulans</i>                | 0.002             | 0.004 | 173.2  | 0.017             | 0.004 | 21.7   | 0.008   | **   |
| OTU_113             | eukaryotes      | golden algae                               | 0.843             | 0.107 | 12.7   | 0.360             | 0.162 | 44.9   | 0.017   | *    |
| OTU_62              | eukaryotes      | <i>Pirsonia guinardiae</i>                 | 2.133             | 0.595 | 27.9   | 0.581             | 0.249 | 42.8   | 0.031   | *    |
| OTU_187             | eukaryotes      | <i>Telonema subtile</i>                    | 0.324             | 0.036 | 11.1   | 0.177             | 0.066 | 37.0   | 0.040   | *    |
| OTU_2047            | eukaryotes      | <i>Ciliophrys infusionum</i>               | 0.011             | 0.004 | 35.1   | 0.002             | 0.004 | 173.2  | 0.048   | *    |
| OTU_1358            | green algae     | <i>Tetraselmis</i> _sp._GSL018             | 0                 | 0.000 |        | 0.006             | 0.000 | 2.2    | 0.000   | ***  |
| OTU_74              | green algae     | uncultured <i>Chlorophyta</i>              | 0.089             | 0.027 | 30.5   | 0.213             | 0.039 | 18.4   | 0.014   | *    |
| OTU_112             | green algae     | uncultured <i>Chlorophyta</i>              | 0.057             | 0.013 | 22.1   | 0.008             | 0.004 | 43.4   | 0.016   | *    |
| OTU_519             | haptophytes     | <i>Haptophyta</i> _environmental_samples   | 0.095             | 0.010 | 10.9   | 0.015             | 0.013 | 89.6   | 0.001   | **   |
| OTU_264             | haptophytes     | uncultured marine haptophyte               | 0.131             | 0.024 | 18.0   | 0.027             | 0.014 | 53.4   | 0.005   | **   |
| OTU_191             | haptophytes     | <i>Haptophyta</i> _environmental_samples   | 0.338             | 0.065 | 19.2   | 0.080             | 0.064 | 80.2   | 0.008   | **   |
| OTU_397             | haptophytes     | <i>Haptophyta</i> _environmental_samples   | 0.099             | 0.019 | 19.2   | 0.006             | 0.006 | 100.7  | 0.008   | **   |
| OTU_192             | haptophytes     | <i>Haptophyta</i> _environmental_samples   | 0.626             | 0.137 | 21.8   | 0.077             | 0.071 | 91.9   | 0.009   | **   |
| OTU_2037            | haptophytes     | <i>Haptophyta</i> _environmental_samples   | 0.015             | 0.004 | 24.1   | 0                 | 0.000 |        | 0.019   | *    |
| OTU_246             | haptophytes     | <i>Haptophyta</i> _environmental_samples   | 0.237             | 0.061 | 25.9   | 0.006             | 0.006 | 99.3   | 0.022   | *    |
| OTU_1044            | haptophytes     | unidentified prymnesiophyte clone OLI26017 | 0.023             | 0.004 | 16.3   | 0.006             | 0.006 | 99.3   | 0.022   | *    |
| OTU_412             | haptophytes     | <i>Haptophyta</i> _environmental_samples   | 0.085             | 0.017 | 20.0   | 0.027             | 0.024 | 87.6   | 0.032   | *    |
| OTU_582             | haptophytes     | <i>Haptophyta</i> _environmental_samples   | 0.046             | 0.016 | 33.5   | 0.015             | 0.010 | 67.3   | 0.050   | *    |
| OTU_305             | pelagophytes    | Cocoid pelagophyte_CCMP1395                | 0.163             | 0.038 | 23.2   | 0.080             | 0.029 | 36.5   | 0.043   | *    |

54

55  
56

Ocean acidification effects on planktonic eukaryotes

57  
58  
59  
60

**Table 2:** Proportion (%) of significantly CO<sub>2</sub>-affected OTUs within the given relative abundance range for each sample

| Rel. Abundance range of OTUs | ISCO-DNA-t0 | HICO-DNA-t0 | ISCO-DNA-t2 | HICO-DNA-t2 | ISCO-cDNA-t2 | HICO-cDNA-t2 |
|------------------------------|-------------|-------------|-------------|-------------|--------------|--------------|
| <b>1-100%</b>                | 9.4         | 0.0         | 12.0        | 0.0         | 13.4         | 0.0          |
| <b>0.1-1%</b>                | 6.1         | 8.3         | 7.6         | 8.1         | 9.5          | 9.6          |
| <b>0.01-0.1%</b>             | 6.4         | 5.1         | 6.9         | 3.3         | 7.8          | 6.8          |
| <b>0.001-0.01%</b>           | 3.2         | 6.3         | 2.3         | 6.4         | 2.5          | 7.9          |
| <b>0-0.001%</b>              | 0.0         | 0.9         | 0.0         | 0.5         | 0.1          | 0.2          |

61  
62  
63

Ocean acidification effects on planktonic eukaryotes

## Supplementary Material

### Short-term responses to ocean acidification: effects on relative abundance of eukaryotic plankton from the tropical Timor Sea

Janina Rahlff<sup>1\*‡</sup>, Sahar Khodami<sup>2</sup>, Lisa Voskuhl<sup>3</sup>, Matthew P. Humphreys<sup>4</sup>, Christian Stolle<sup>1,5,#</sup>, Pedro Martinez Arbizu<sup>2</sup>, Oliver Wurl<sup>1</sup>, and Mariana Ribas-Ribas<sup>1</sup>

<sup>1</sup>Center for Marine Sensors, Institute for Chemistry and Biology of the Marine Environment (ICBM), Carl von Ossietzky University Oldenburg, 26382 Wilhelmshaven, Germany

<sup>‡</sup>Present address: University of Duisburg-Essen, Department of Chemistry, Environmental Microbiology and Biotechnology (EMB), 45141 Essen, Germany

<sup>2</sup>Senckenberg am Meer, German Center for Marine Biodiversity Research, 26382, Wilhelmshaven, Germany

<sup>3</sup>University of Duisburg-Essen, Department of Chemistry, Environmental Microbiology and Biotechnology (EMB), 45141 Essen, Germany

<sup>4</sup>NIOZ Royal Netherlands Institute for Sea Research, Department of Ocean Systems (OCS), and Utrecht University, 1790 AB Den Burg, Texel, the Netherlands

<sup>5</sup>Leibniz Institute for Baltic Sea Research (IOW), 18119 Rostock, Germany

<sup>#</sup>Present address: Project management Jülich, 18069 Rostock, Germany

\*Corresponding author: [janina.rahlff@uol.de](mailto:janina.rahlff@uol.de)

## Ocean acidification effects on planktonic eukaryotes

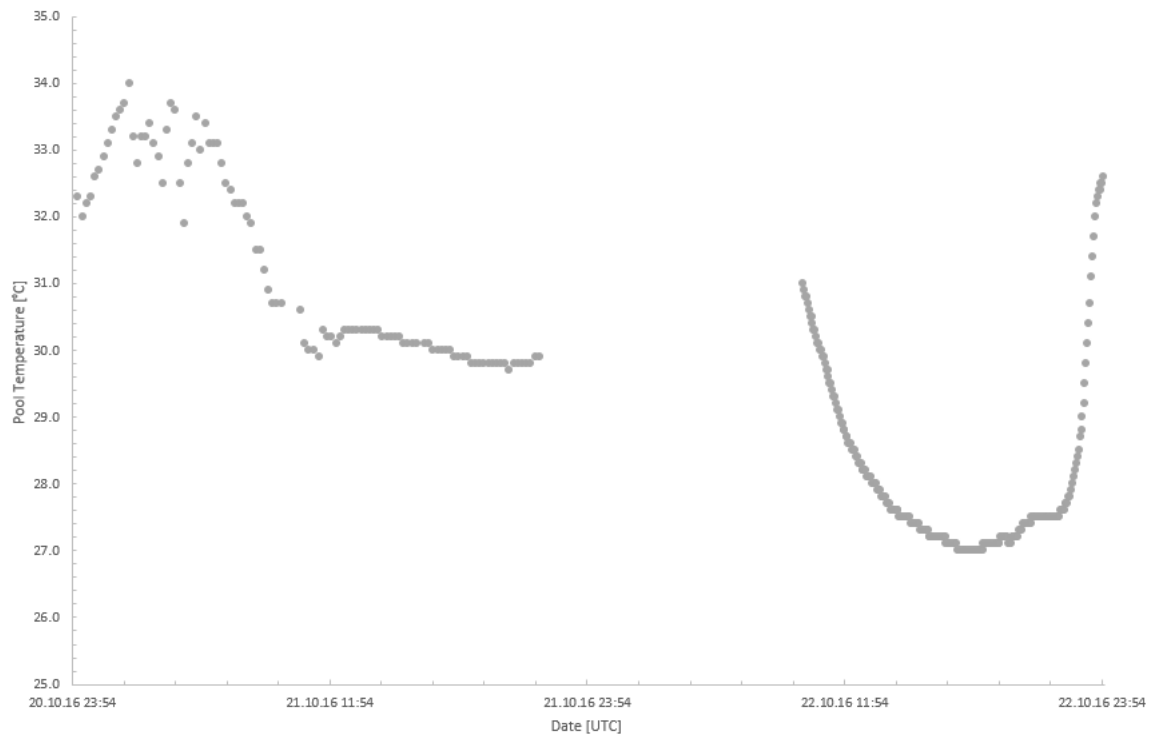

**Supplementary Figure S1:** Temperature of pool water ( $^{\circ}\text{C}$ ) surrounding incubated bottles. Dates refer to  $t_0$  to  $t_2$ , respectively. The data gap happened due to an unrecognized full memory of the measuring device.

## Ocean acidification effects on planktonic eukaryotes

### Supplementary Table S1: Sequencing statistic

| Sample            | OR    | NC    | NFC   | NDC  | NOTU |
|-------------------|-------|-------|-------|------|------|
| ISCO_T0_Rep1_DNA  | 33425 | 32836 | 31938 | 4937 | 1075 |
| ISCO_T0_Rep2_DNA  | 21719 | 21282 | 20645 | 3879 | 964  |
| ISCO_T0_Rep3_DNA  | 20884 | 20425 | 19872 | 4416 | 1136 |
| HICO_T0_Rep1_DNA  | 41687 | 40979 | 39868 | 4632 | 734  |
| HICO_T0_Rep2_DNA  | 23568 | 23120 | 22535 | 3554 | 758  |
| HICO_T0_Rep3_DNA  | 26357 | 25890 | 25201 | 4086 | 827  |
| ISCO_T0_Rep1_cDNA | 20866 | 20422 | 19918 | 4302 | 874  |
| ISCO_T0_Rep2_cDNA | 22088 | 21576 | 20989 | 4340 | 820  |
| ISCO_T0_Rep3_cDNA | 22804 | 22269 | 21694 | 4955 | 903  |
| HICO_T0_Rep1_cDNA | 20845 | 20349 | 19824 | 3563 | 725  |
| HICO_T0_Rep2_cDNA | 24828 | 24313 | 23659 | 5020 | 938  |
| ISCO_T2_Rep1_DNA  | 27758 | 27155 | 26514 | 4103 | 687  |
| ISCO_T2_Rep2_DNA  | 39897 | 38945 | 37960 | 5673 | 913  |
| ISCO_T2_Rep3_DNA  | 22283 | 21718 | 21131 | 3418 | 713  |
| HICO_T2_Rep1_DNA  | 20616 | 20107 | 19540 | 3051 | 543  |
| HICO_T2_Rep2_DNA  | 26290 | 25701 | 25083 | 3661 | 662  |
| HICO_T2_Rep3_DNA  | 26214 | 25636 | 25011 | 3834 | 658  |
| ISCO_T2_Rep1_cDNA | 25148 | 24584 | 23843 | 4203 | 614  |
| ISCO_T2_Rep2_cDNA | 23151 | 22543 | 21846 | 4198 | 615  |
| ISCO_T2_Rep3_cDNA | 21096 | 20562 | 19957 | 3692 | 581  |
| HICO_T2_Rep1_cDNA | 23955 | 23442 | 22806 | 4169 | 569  |
| HICO_T2_Rep2_cDNA | 31848 | 31129 | 30292 | 3791 | 503  |
| HICO_T2_Rep3_cDNA | 27061 | 26488 | 25696 | 4185 | 588  |

OR= original reads

NC= number of contigs

NFC= number of contigs after filtering

NDC= number of dereplicated contigs

NOTU= number of OTUs

# Ocean acidification effects on planktonic eukaryotes

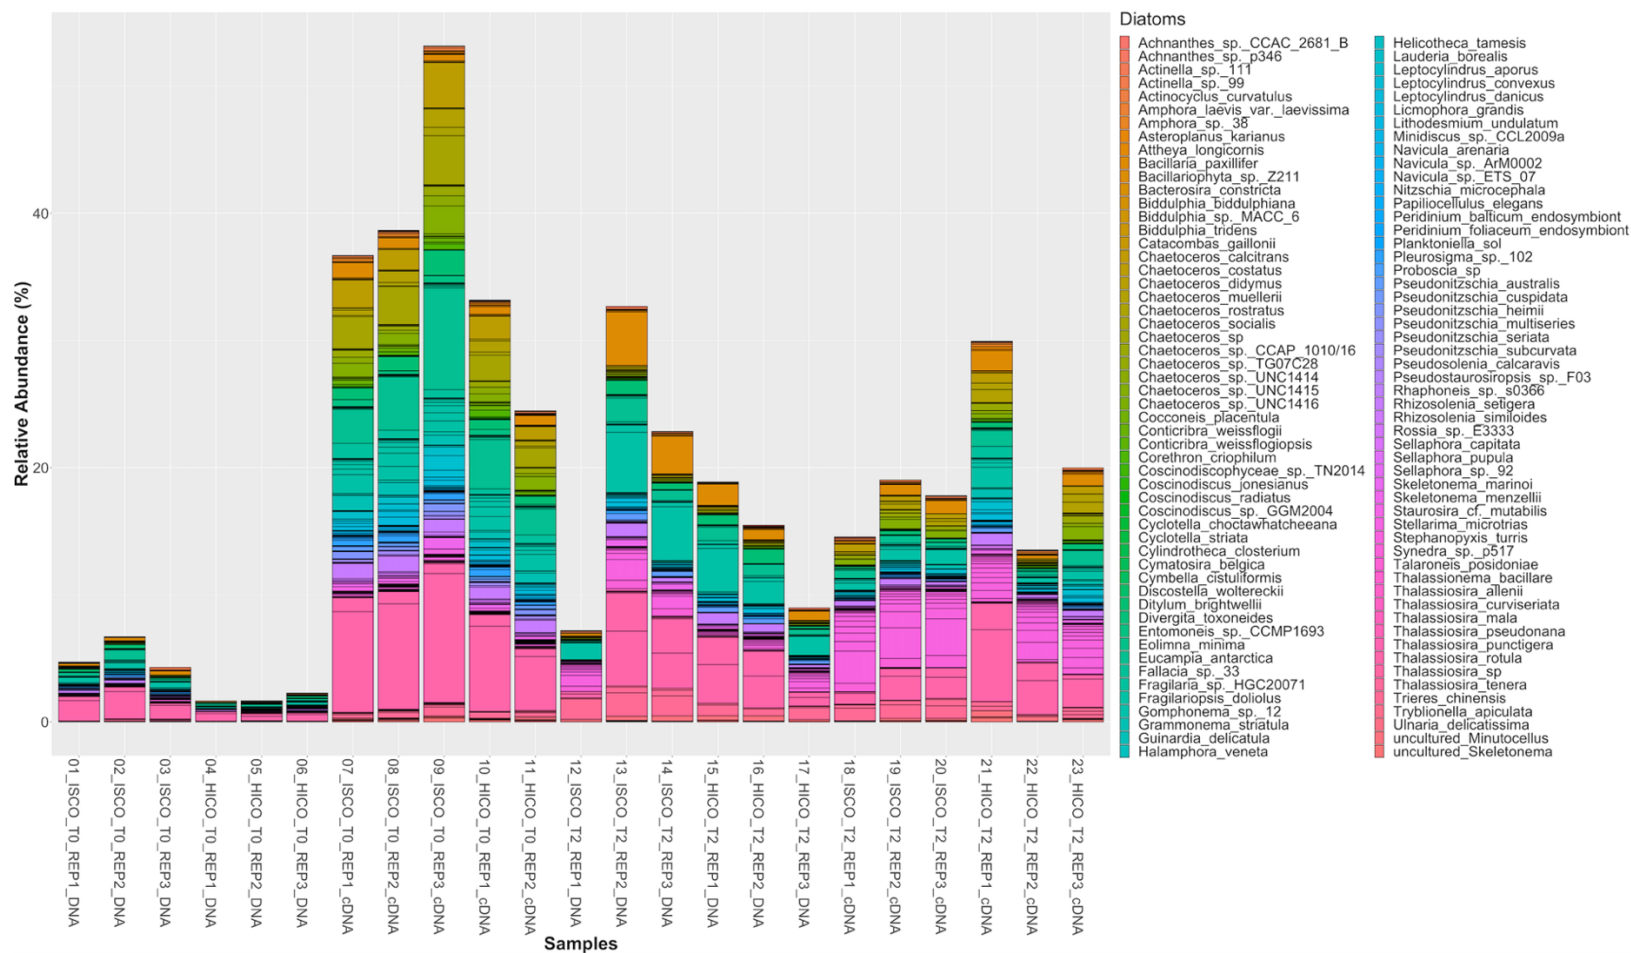

**Supplementary Figure S2:** Relative abundance (%) of diatoms in ISCO (*in situ* CO<sub>2</sub>) and HICO (high CO<sub>2</sub>) treatment after immediate (t<sub>0</sub>) and 48 hours (t<sub>2</sub>) treatment exposure.

# Ocean acidification effects on planktonic eukaryotes

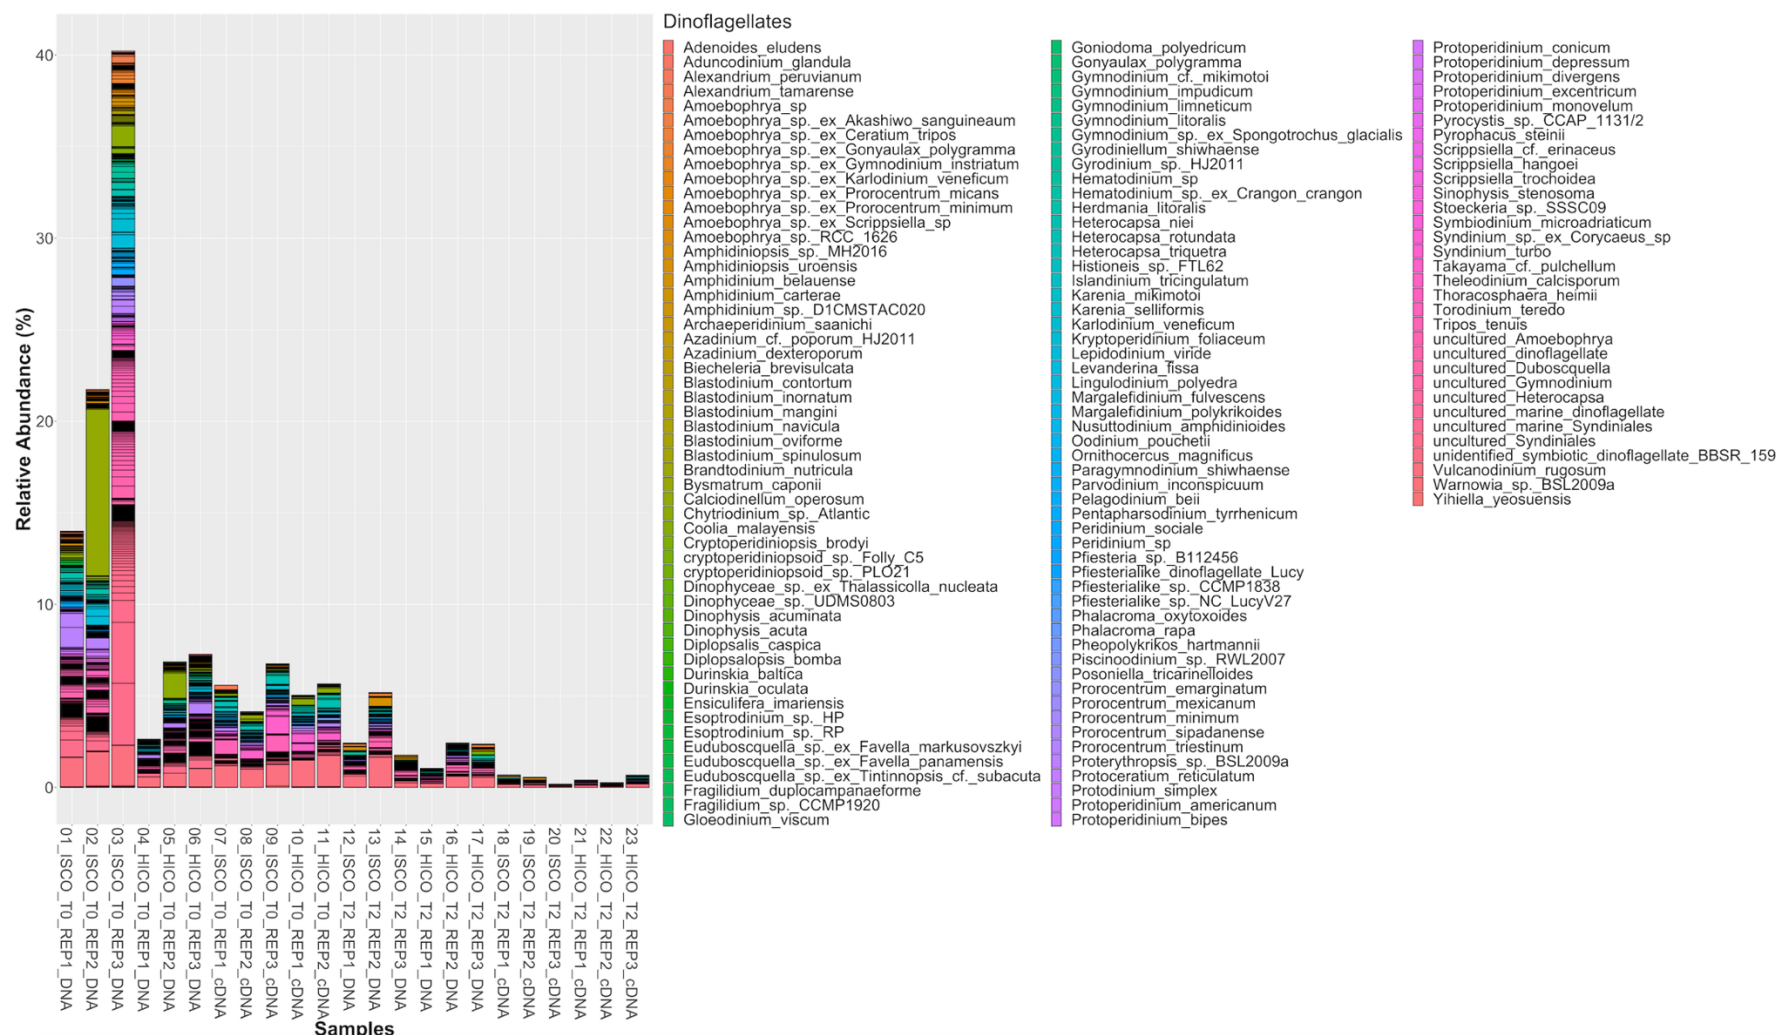

**Supplementary Figure S3:** Relative abundance (%) of dinoflagellates in ISCO (*in situ* CO<sub>2</sub>) and HICO (high CO<sub>2</sub>) treatment after immediate (t<sub>0</sub>) and 48 hours (t<sub>2</sub>) treatment exposure.



# Ocean acidification effects on planktonic eukaryotes

1

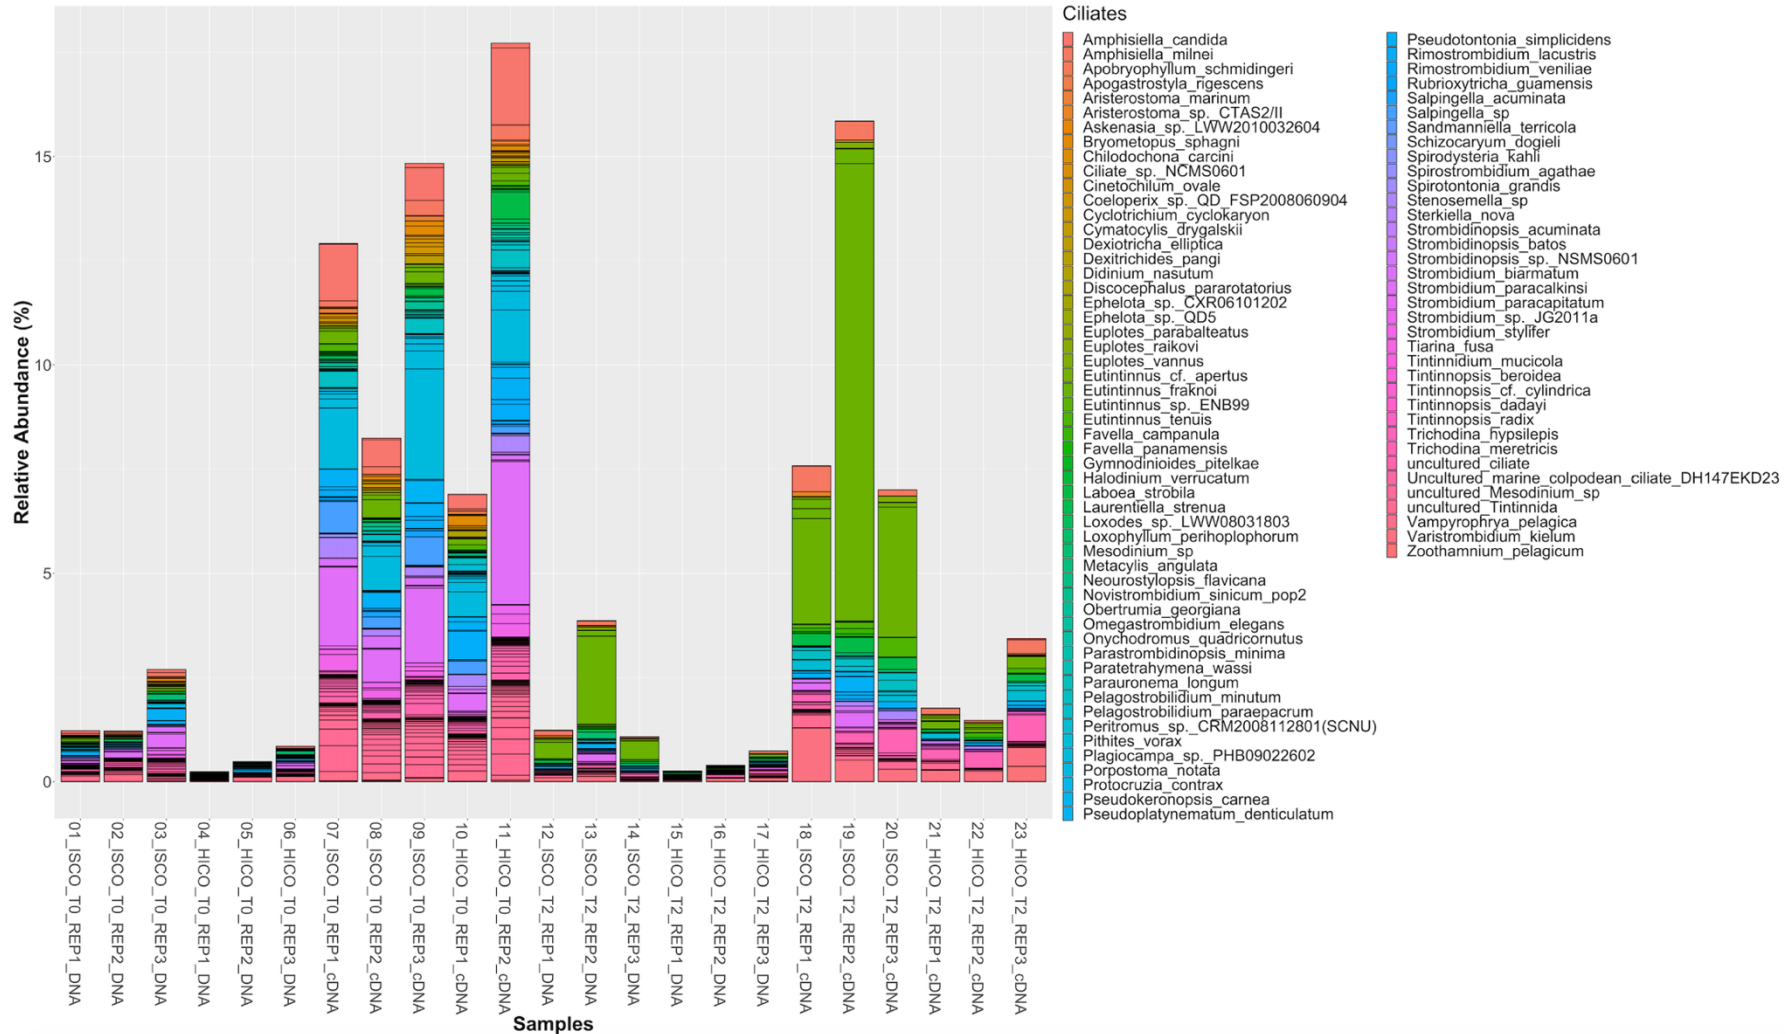

2

3 **Supplementary Figure S4:** Relative abundance (%) of ciliates in ISCO (*in situ* CO<sub>2</sub>) and HICO (high CO<sub>2</sub>) treatment after immediate (t<sub>0</sub>) and 48  
4 hours (t<sub>2</sub>) treatment exposure.



# Ocean acidification effects on planktonic eukaryotes

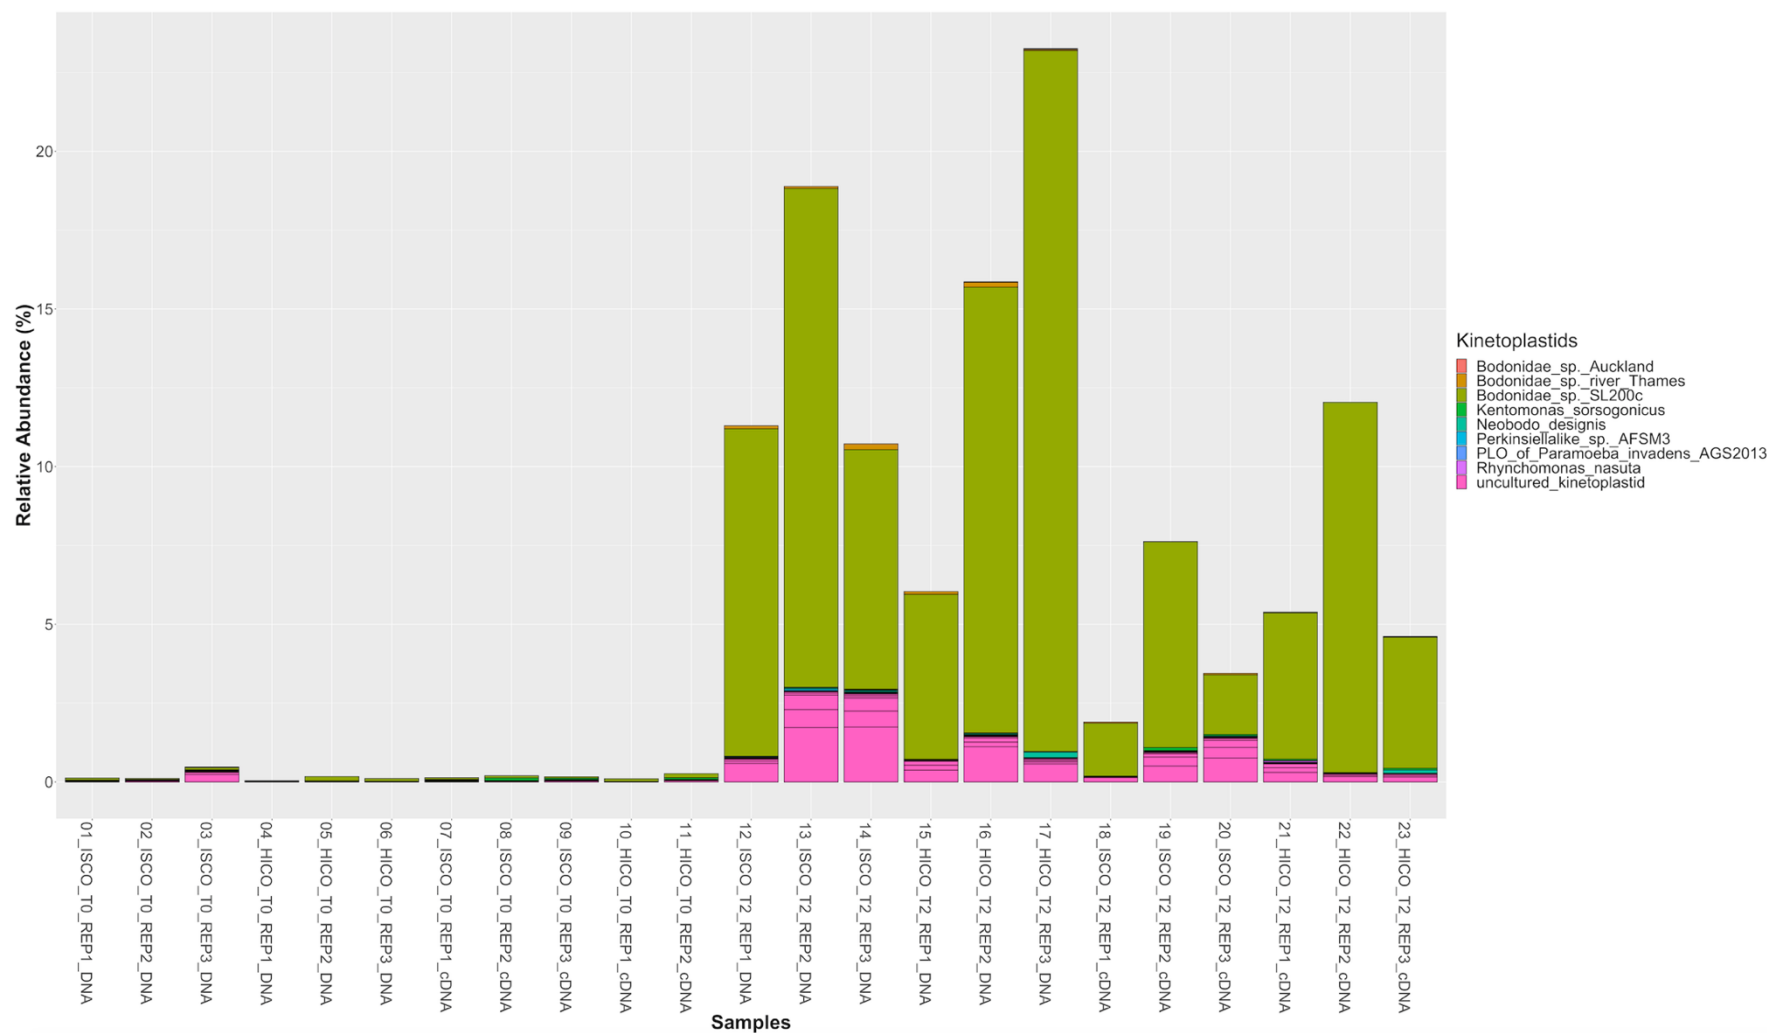

5  
6  
7  
8

**Supplementary Figure S5:** Relative abundance (%) of kinetoplastids in ISCO (*in situ* CO<sub>2</sub>) and HICO (high CO<sub>2</sub>) treatment after immediate (t<sub>0</sub>) and 48 hours (t<sub>2</sub>) treatment exposure.

# Ocean acidification effects on planktonic eukaryotes

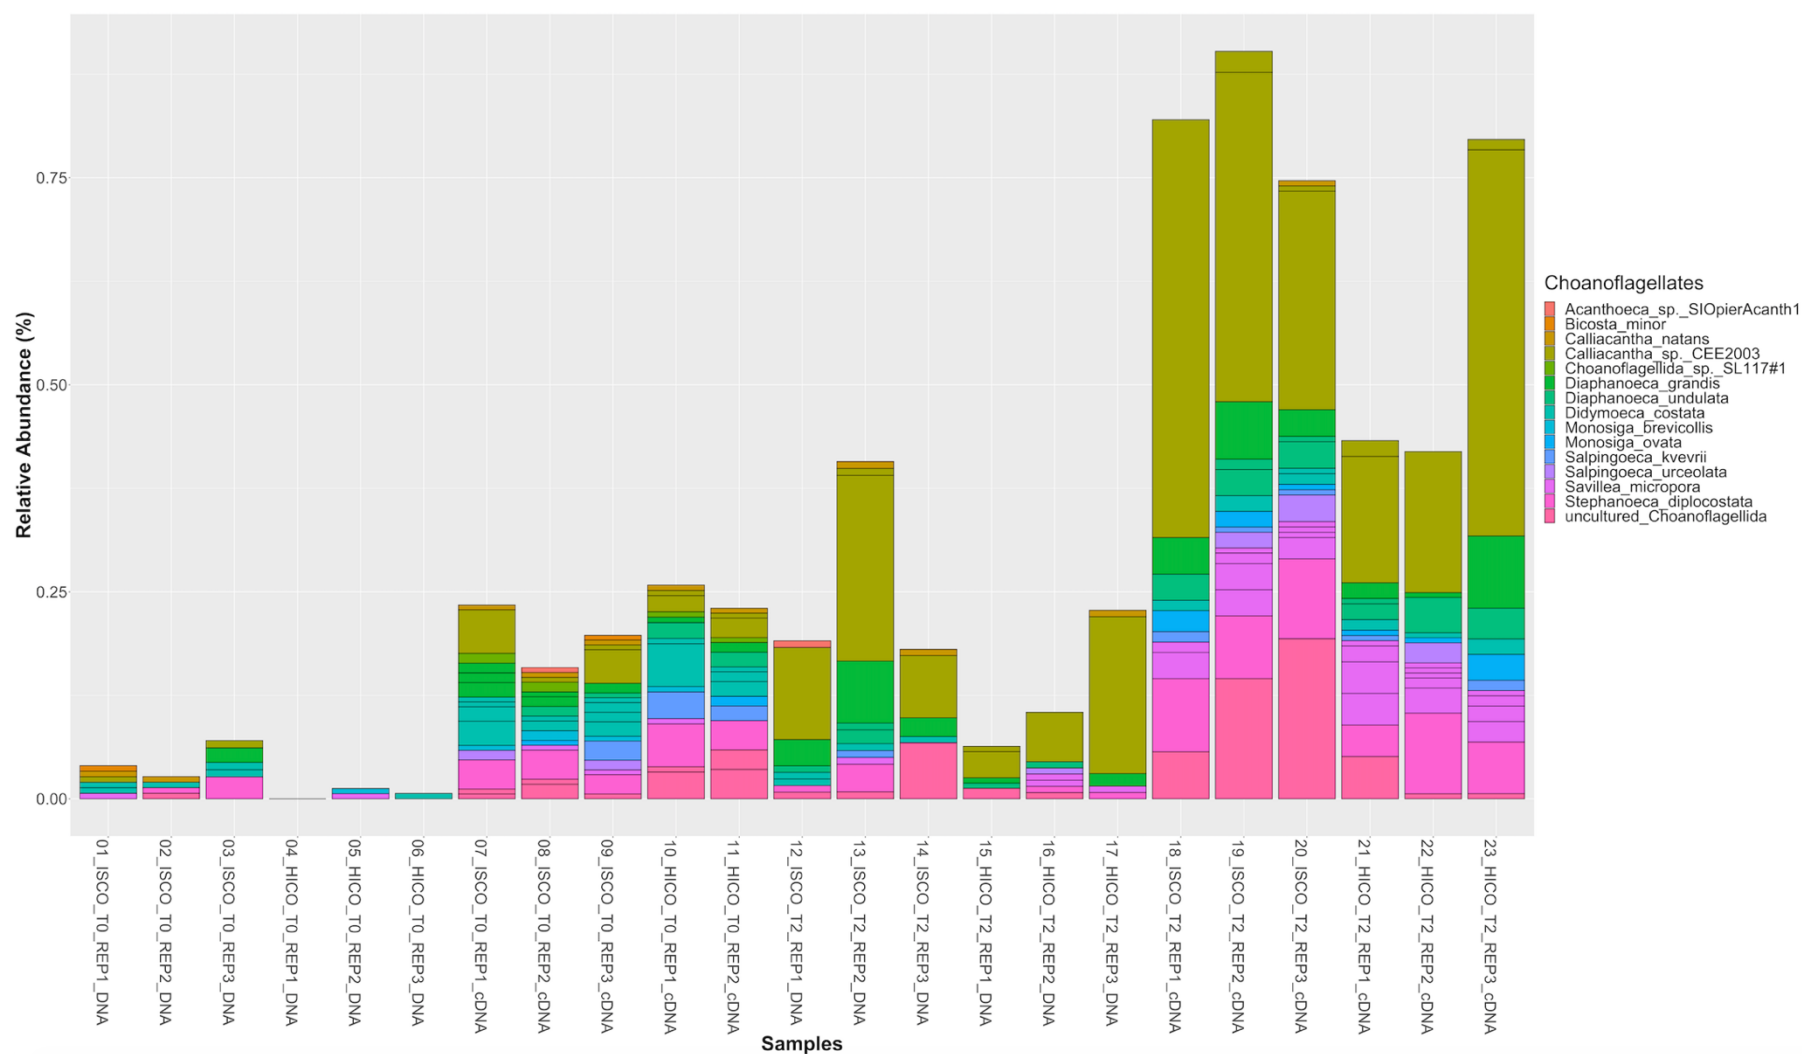

9  
10  
11  
12  
13

**Supplementary Figure S6:** Relative abundance (%) of choanoflagellates in ISCO (*in situ* CO<sub>2</sub>) and HICO (high CO<sub>2</sub>) treatment after immediate (t<sub>0</sub>) and 48 hours (t<sub>2</sub>) treatment exposure.

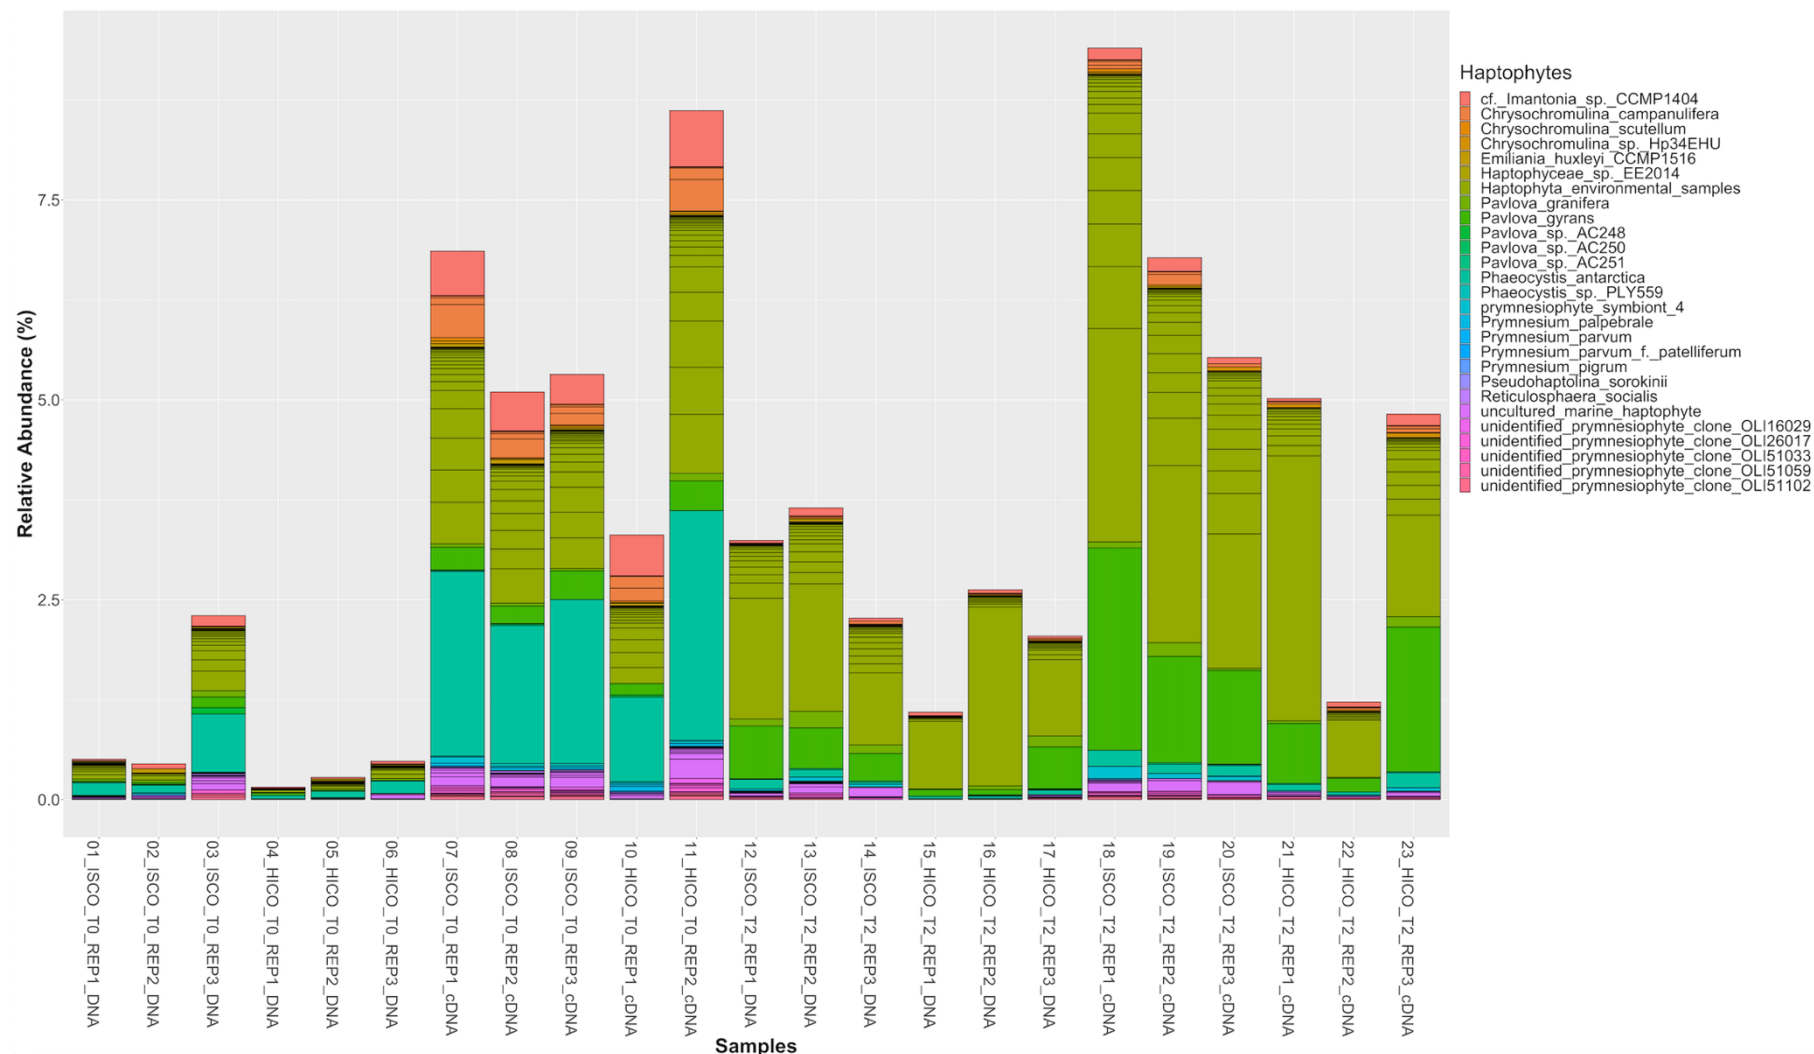

**Supplementary Figure S7:** Relative abundance (%) of haptophytes in ISCO (*in situ* CO<sub>2</sub>) and HICO (high CO<sub>2</sub>) treatment after immediate (t<sub>0</sub>) and 48 hours (t<sub>2</sub>) treatment exposure.

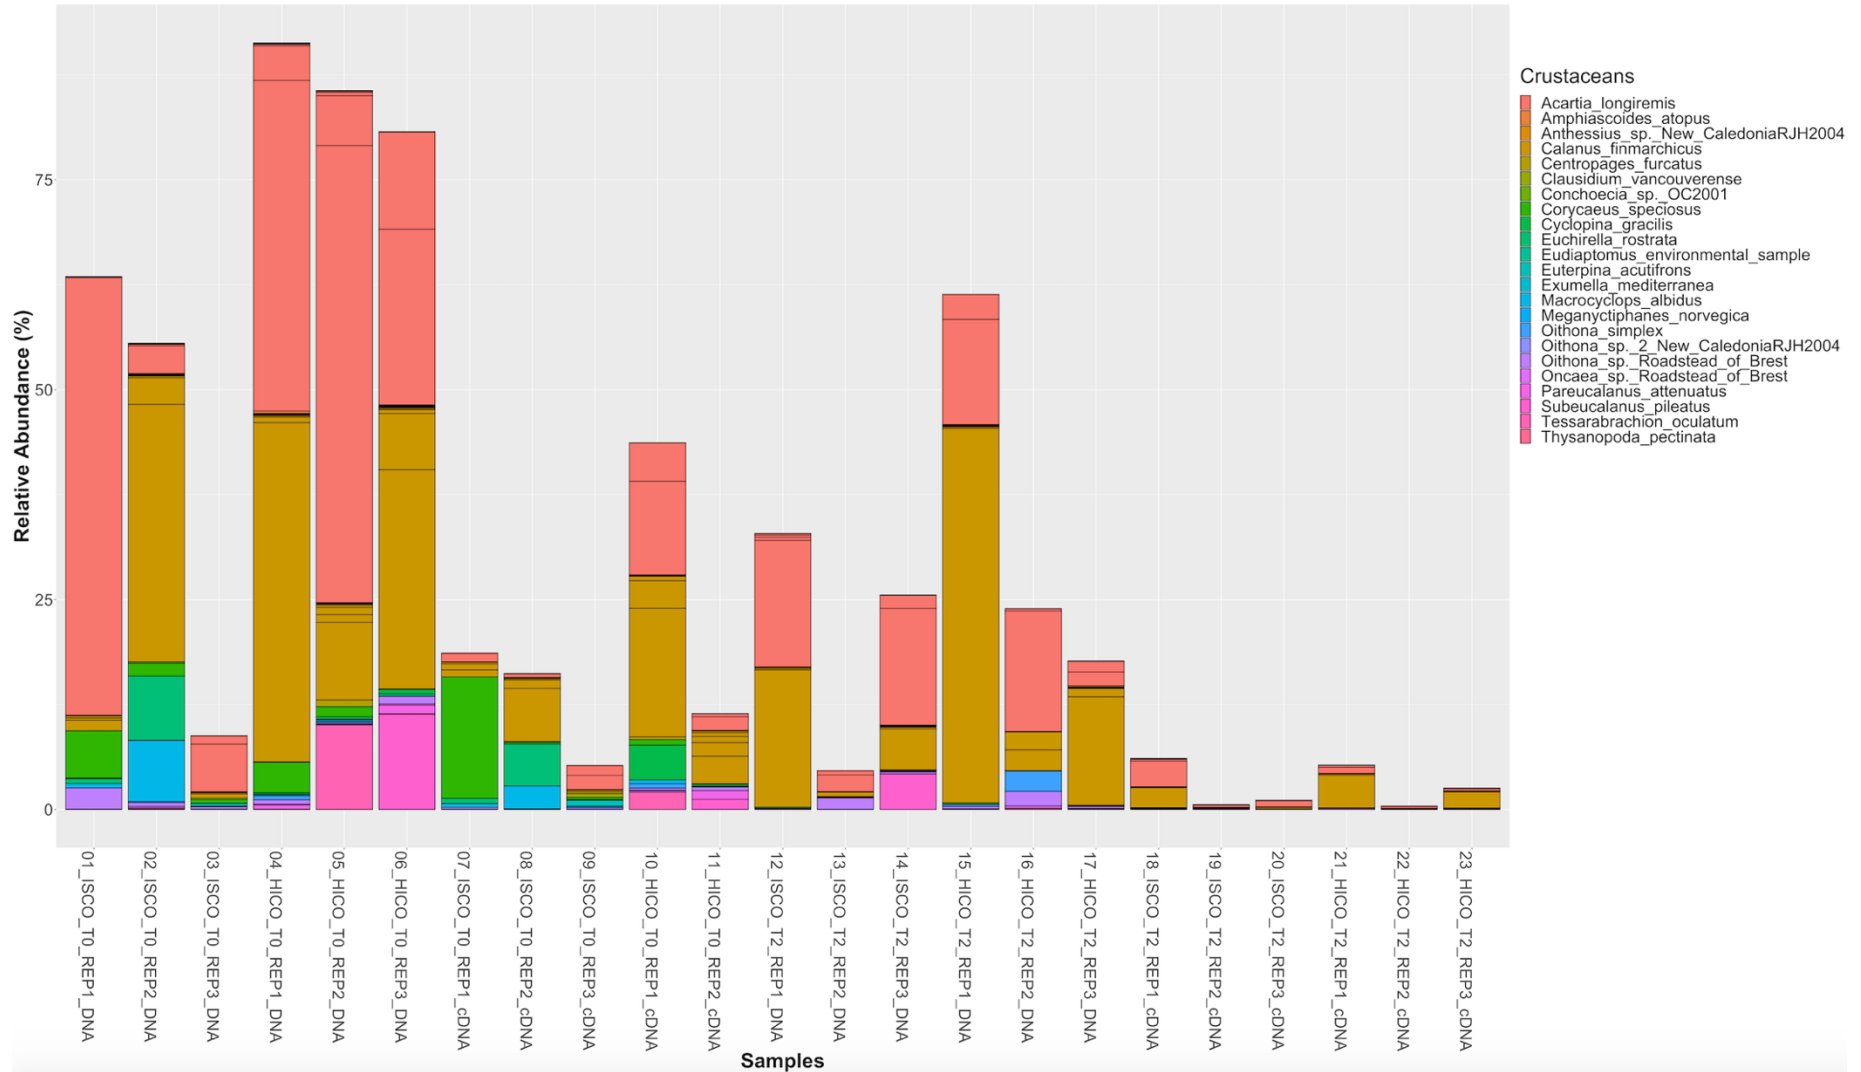

**Supplementary Figure S8:** Relative abundance (%) of crustaceans in ISCO (*in situ* CO<sub>2</sub>) and HICO (high CO<sub>2</sub>) treatment after immediate (t<sub>0</sub>) and 48 hours (t<sub>2</sub>) treatment exposure.

Ocean acidification effects on planktonic eukaryotes

23  
24

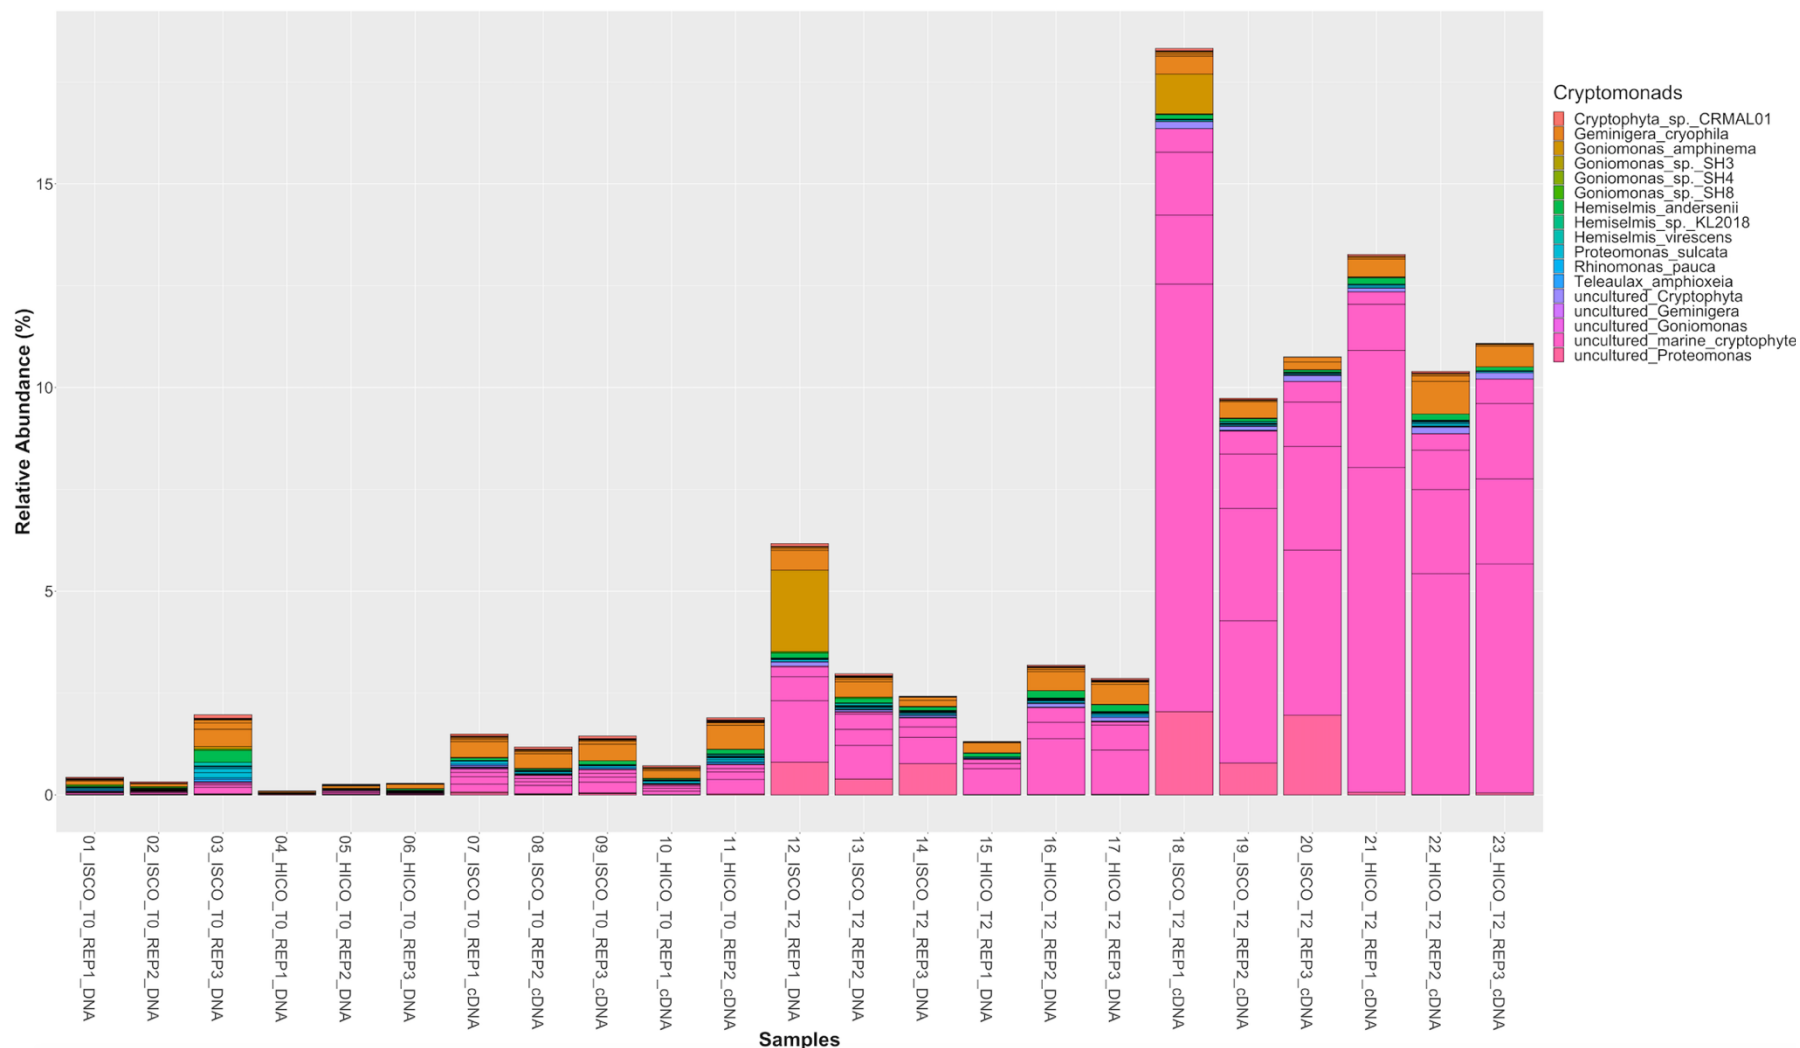

25  
26  
27

**Supplementary Figure S9:** Relative abundance (%) of cryptomonads in ISCO (*in situ* CO<sub>2</sub>) and HICO (high CO<sub>2</sub>) treatment after immediate (t<sub>0</sub>) and 48 hours (t<sub>2</sub>) treatment exposure.

Ocean acidification effects on planktonic eukaryotes

28  
29

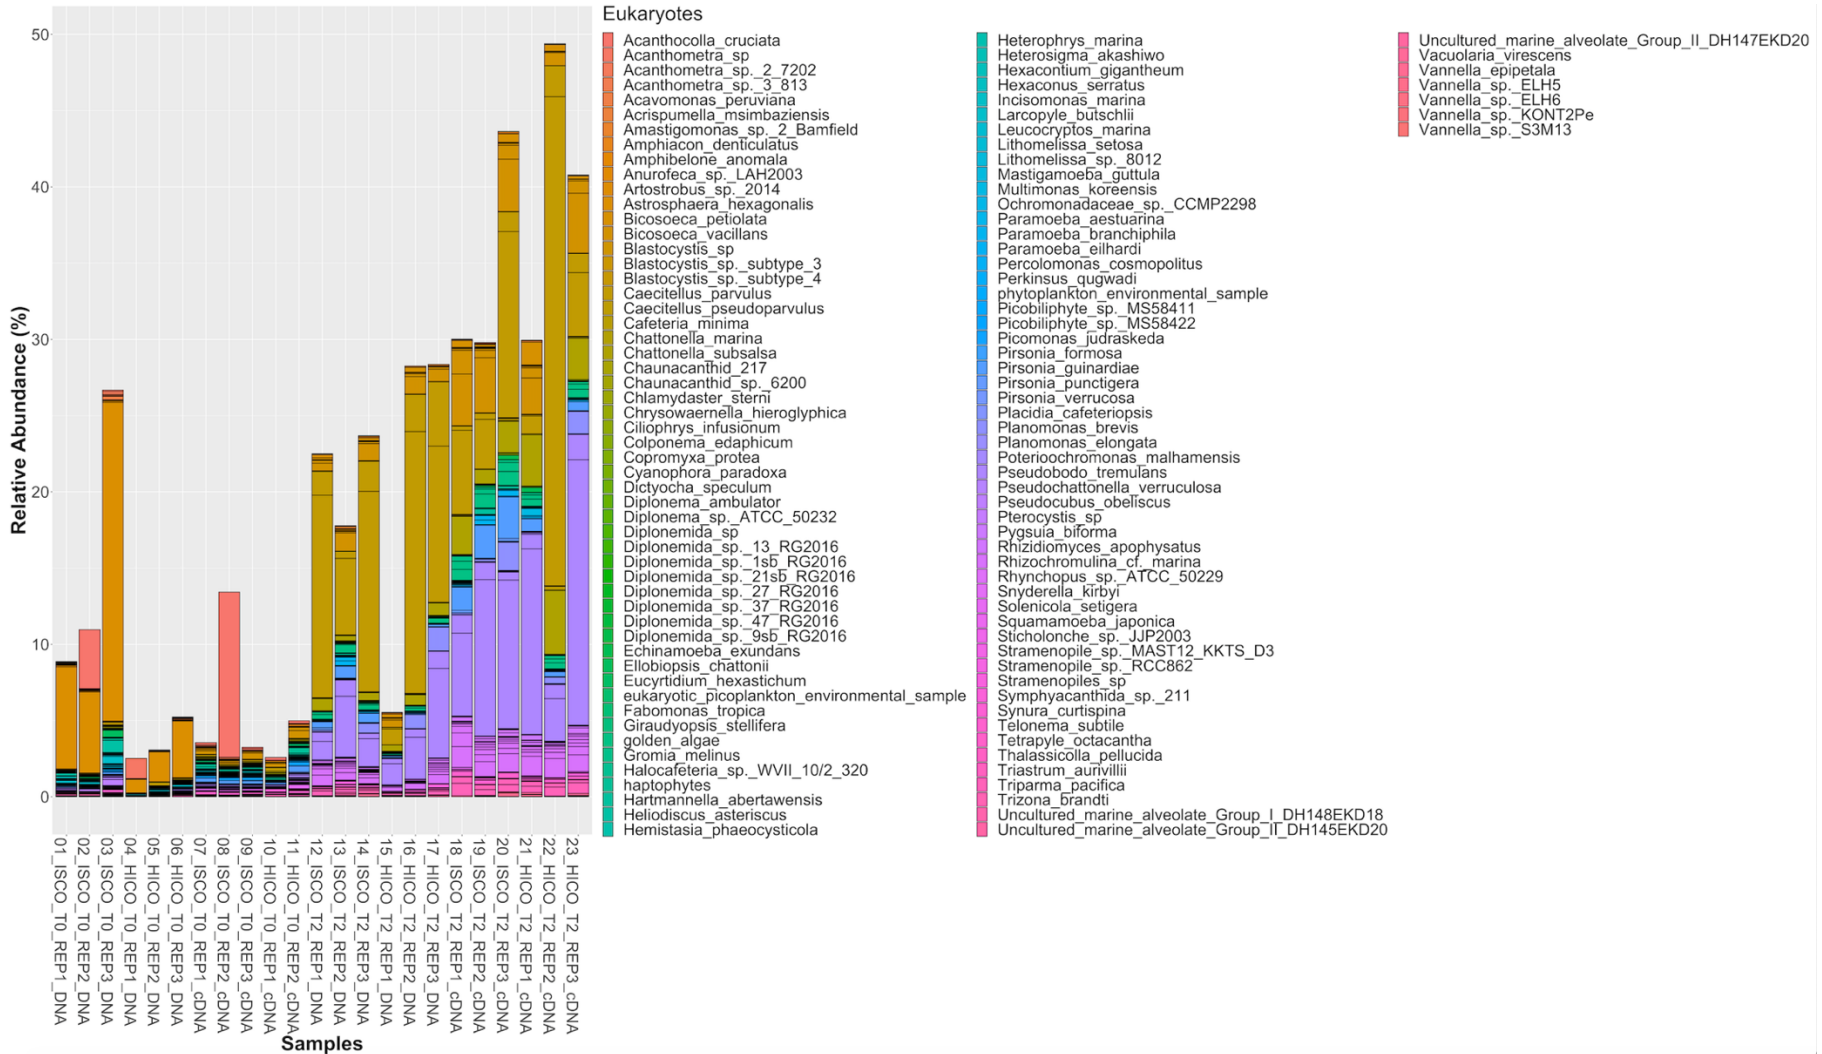

30  
31  
32

**Supplementary Figure S10:** Relative abundance (%) of eukaryotes in ISCO (*in situ* CO<sub>2</sub>) and HICO (high CO<sub>2</sub>) treatment after immediate (t<sub>0</sub>) and 48 hours (t<sub>2</sub>) treatment exposure.

# Ocean acidification effects on planktonic eukaryotes

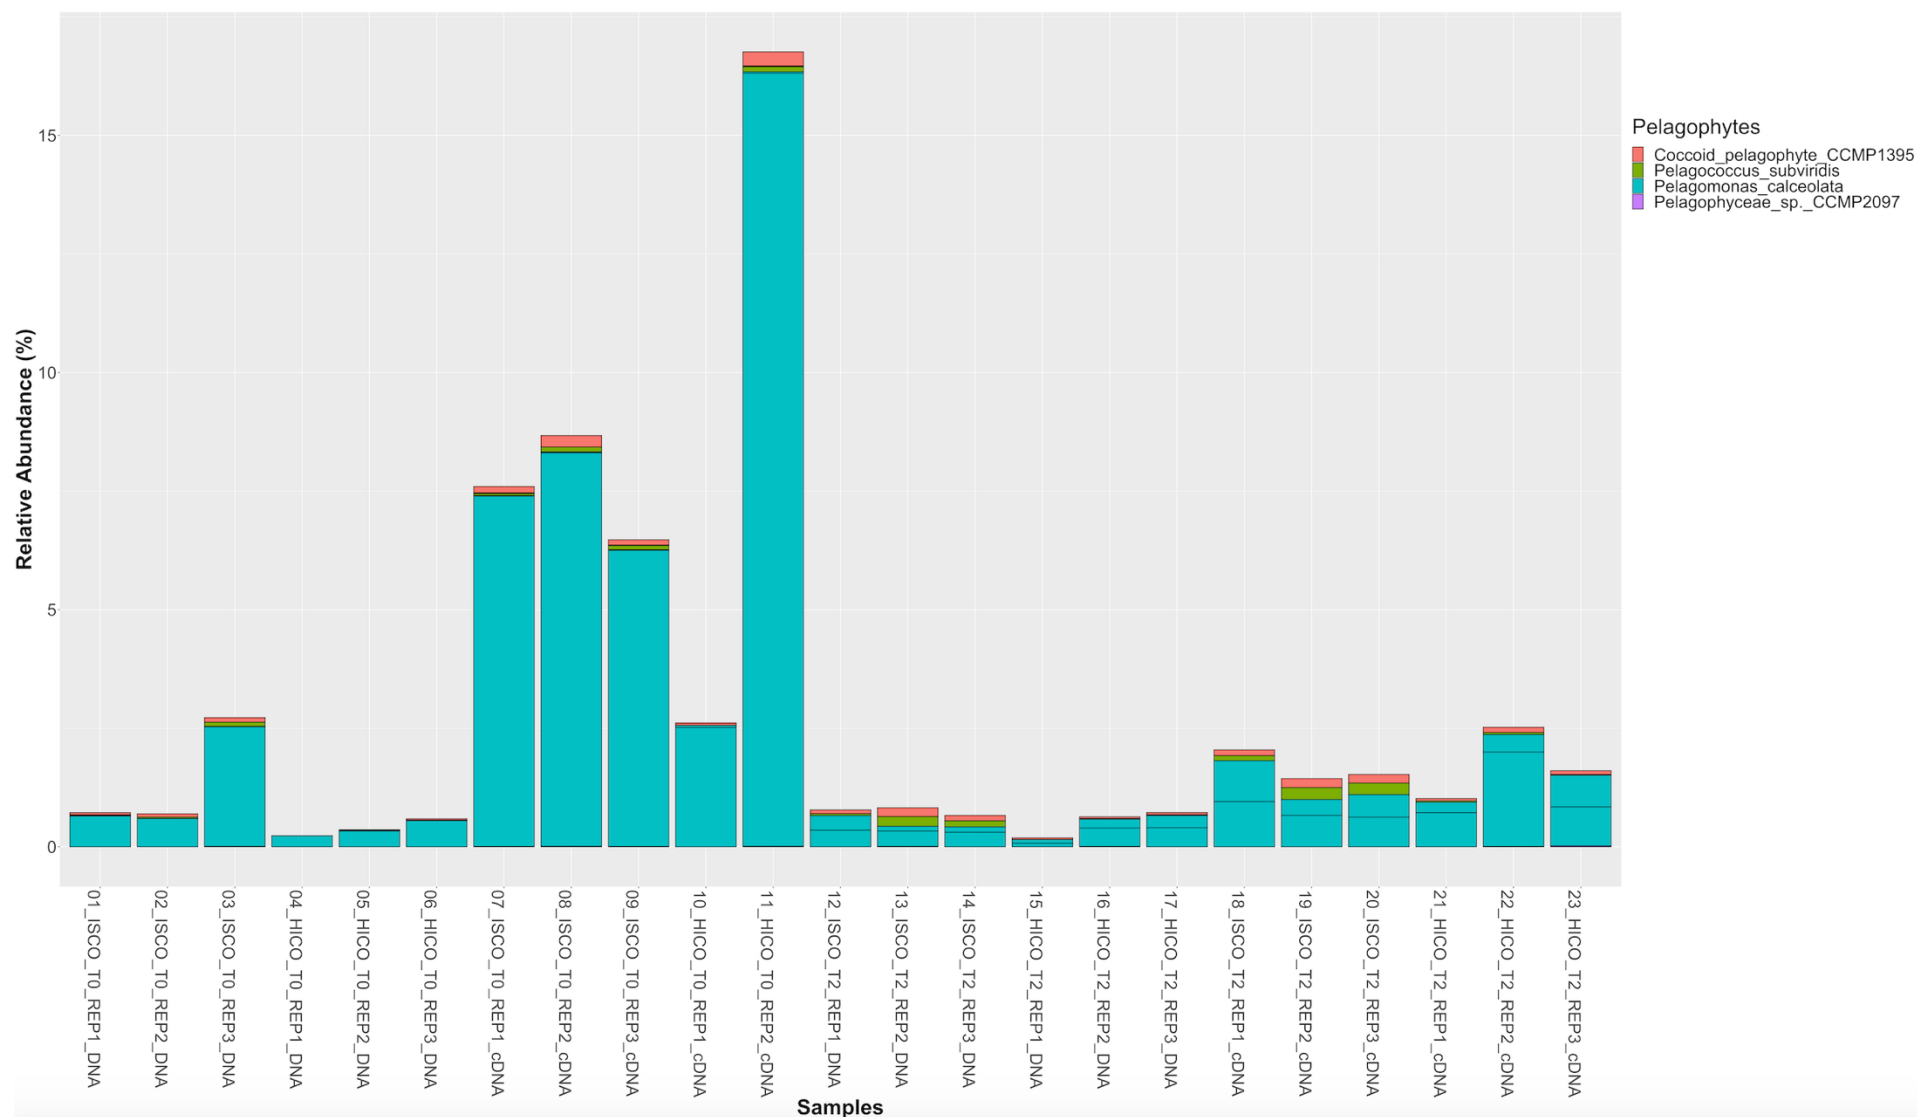

33  
34  
35

**Supplementary Figure S11:** Relative abundance (%) of pelagophytes in ISCO (*in situ* CO<sub>2</sub>) and HICO (high CO<sub>2</sub>) treatment after immediate (t<sub>0</sub>) and 48 hours (t<sub>2</sub>) treatment exposure.

# Ocean acidification effects on planktonic eukaryotes

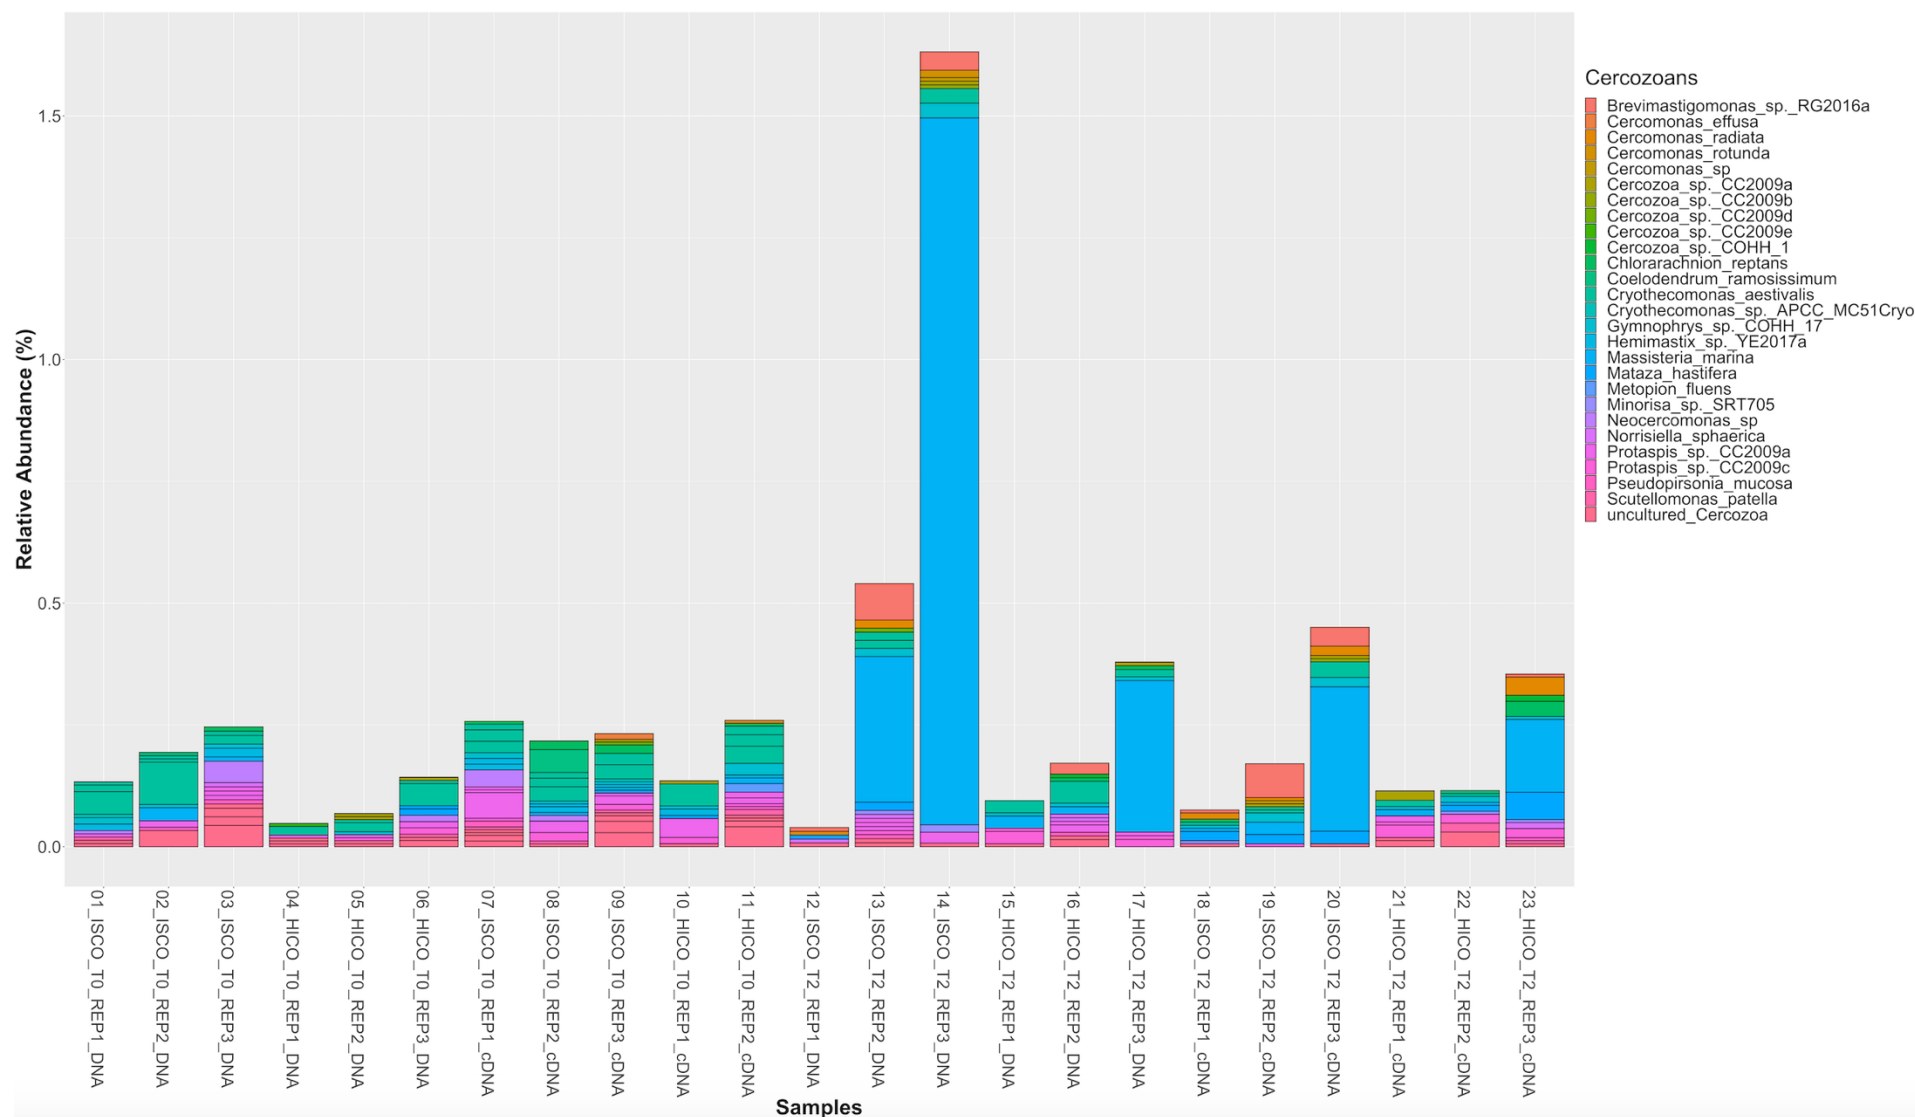

36  
37  
38

**Supplementary Figure S12:** Relative abundance (%) of cercozoans in ISCO (*in situ* CO<sub>2</sub>) and HICO (high CO<sub>2</sub>) treatment after immediate (t<sub>0</sub>) and 48 hours (t<sub>2</sub>) treatment exposure.
